# Supplementary material for: In Vivo Skin Hydrating Efficacy of Fish Collagen from Greenland Halibut as a High-Value Active Ingredient for Cosmetic Applications
Source: MDPI journal article supplement (doi:10.3390/md21020057), 2023-01-17
Supplement: s1 [file s1]

## Supplementary Materials

### Supplementary Material SI – Cosmetic product information

#### SI – Technical information of marine-derived cosmetic product

Table S1. Organoleptic characteristics and technical description of cosmetic products available on the market which have marine collagen ingredients.

| Commercial name                                                                                | INCI name                                                        | Producer                                           | Use level (%) | Soluble collagen content (%) | Organoleptic characteristics                                                      |
|------------------------------------------------------------------------------------------------|------------------------------------------------------------------|----------------------------------------------------|---------------|------------------------------|-----------------------------------------------------------------------------------|
| <b>AC Marine Collagen PF</b>                                                                   | Soluble collagen (98%), leuconostoc/radish root ferment filtrate | Active concepts                                    | 1.0 - 10.0    | 1.0                          | Hazy viscous liquid                                                               |
| <b>Pancogene marin 2</b>                                                                       | Aqua, soluble collagen, phenoxyethanol                           | Gatefosse                                          | 2.0 - 5.0     | 0.3                          | Opalescent liquid                                                                 |
| <b>Collagen CLR (extracted from calf skin in a weakly acidic buffer without using enzymes)</b> | Soluble collagen sodium benzoate                                 | CLR Chemisches Laboratoriu m Dr. Kurt Richter GmbH | 3.0 – 10.0    | 0.5                          | Transparent, colourless to yellowish, at room temperature slightly viscous liquid |
| <b>Collasol™ M PE</b>                                                                          | Aqua, soluble collagen                                           | Croda                                              | -             | 0.5                          | -                                                                                 |
| <b>Maricol S (Tuna)</b>                                                                        | Aqua, soluble collagen, sodium benzoate                          | Croda                                              | -             | 0.1 – 1.0                    | Water-clear, almost transparent, viscous liquid, almost odourless                 |

|                                    |                                                                                 |                                          |           |           |                                                       |
|------------------------------------|---------------------------------------------------------------------------------|------------------------------------------|-----------|-----------|-------------------------------------------------------|
| <b>Ichtyocollagene</b>             | Aqua,<br>propyleneglycol,<br>soluble collagen                                   | Sederma                                  | 2.0 – 6.0 | 0.4 – 0.7 | Clear to slightly<br>opalescent pale<br>yellow liquid |
| <b>Bio-marine<br/>collagen 6PH</b> | Soluble collagen                                                                | Cobiosa                                  | 0.5 – 5.0 | 5.0 – 7.0 | -                                                     |
| <b>Collaplex 1.0</b>               | Aqua, soluble<br>collagen,<br>phenoxyethanol,<br>methylparaben,<br>ethylparaben | Gfn-Selco                                | -         | 1 – 1.3   | Opaque, viscous<br>solution                           |
| <b>Collaplex 1.0 PHE</b>           | Aqua, soluble<br>collagen,<br>phenoxyethanol                                    | Gfn-Selco                                | 1.0 – 5.0 | -         | -                                                     |
| <b>Marine collagen</b>             | Aqua, soluble<br>collagen                                                       | I.R.A. Istituto<br>Ricerche<br>Applicate | 0.5 – 5.0 | 3.0       | -                                                     |

## **Supplementary Material SII - Subject selection**

### **S2 - Subjects' information**

The subjects were selected according to following inclusion and exclusion criteria.

**Inclusion criteria for Group I:** Gender: Female/Male; Age: 18 years old and over; Having signed an Informed Consent Form (ICF); Willingness, ability and likeliness to comply with all the study procedures and restrictions; Available for the entire study duration; Understanding Portuguese language: Portuguese-speaking subjects capable of reading the documents;

**Exclusion criteria for Group I:** Known allergy or known history of hypersensitivity to the components of the investigational products, comparative products, controls and/or related compounds; Currently participating in another clinical study that may interfere with the study; having diseases that may impair the study; Under pharmacological treatments that may impair the study; - Having applied any type of topical product on the test region (forearms) within the 24 h preceding the first performance study visit; Diagnosed skin diseases and/or cutaneous alterations on the test region (forearms) that can impair the study (E.g. scars, tattoos, marks, burns, excessive body hair); Pregnancy or intention to conceive during the study; Breast-feeding.

Subjects' general health data (including diseases and frequent medication), consumer habits and concomitant medications are recorded on the Case Report Form (CRF).

**The following instructions and advice were given to the included subjects:**

- Subjects must not apply any topical product (cosmetic, pharmaceutical or otherwise) in the evaluation area (forearms), since the 24 hours that precede the first performance study visit (including cosmetic products such as hydrating products, body lotions, shower gels, soaps, etc) and until the end of the study;
- On the first performance study visit, subjects will remain for approximately 9 hours in a temperature and humidity-controlled room; during this time, food and drinks will be provided to all subjects according to their needs;
- In case of adverse events, subjects should inform immediately the research centre;
- Subjects must inform the Investigators in case of any change in their health status or medication;
- Female subjects must inform the Investigators if they become or are found to be pregnant during participation in the study;
- Male subjects must inform the Investigators if their partner becomes or is found to be pregnant during the subject's participation in the study;
- Subjects must address to the study facilities at the scheduled date and time;
- Subjects should be careful in washing their hands as to avoid splashes of water with detergents/soaps/gels during the study performance;
- Subjects must not wash their forearms during the study performance;
- Subjects should keep the forearms exposed (not covered with clothes) and avoid touching with the volar part of the forearm in any surface during the first 9 hours of the study;

- During the study performance, subjects must not have bath and shall avoid the direct contact of water and cleansing products with the forearms;

### S2.1 - Subject' age

Table S2.1 – Information regarding the subject' age

| Subject # | Subject ID | Subjects' Age on recruitment day |
|-----------|------------|----------------------------------|
| 1         | 1          | 41                               |
| 2         | 2          | 58                               |
| 3         | 4          | 30                               |
| 4         | 5          | 40                               |
| 5         | 6          | 32                               |
| 6         | 9          | 49                               |
| 7         | 12         | 55                               |
| 8         | 13         | 64                               |
| 9         | 14         | 44                               |
| 10        | 15         | 36                               |
| 11        | 16         | 40                               |
| 12        | 18         | 37                               |
| 13        | 19         | 19                               |
| 14        | 20         | 60                               |
| 15        | 21         | 51                               |
| 16        | 23         | 29                               |
| 17        | 24         | 61                               |
| 18        | 25         | 27                               |
| 19        | 26         | 32                               |
| 20        | 27         | 23                               |
| 21        | 28         | 40                               |
| 22        | 29         | 45                               |
| 23        | 30         | 33                               |

|               |               |
|---------------|---------------|
|               |               |
| Mean $\pm$ SD | 41 $\pm$ 12.6 |

## S2.2 - Diseases

Table S2.2 – Information regarding the subject' diseases

| Subject ID | Diseases                           |                                            |
|------------|------------------------------------|--------------------------------------------|
|            | Do you have any diagnosed disease? | If yes, specify:                           |
| 1          | No                                 |                                            |
| 2          | No                                 |                                            |
| 4          | No                                 |                                            |
| 5          | No                                 |                                            |
| 6          | No                                 |                                            |
| 9          | No                                 |                                            |
| 12         | No                                 |                                            |
| 13         | No                                 |                                            |
| 14         | Yes                                | Asthma;<br>Hypertension; Allergic rhinitis |
| 15         | No                                 |                                            |
| 16         | Yes                                | Bipolar disorder                           |
| 18         | No                                 |                                            |
| 19         | No                                 |                                            |

|    |     |                            |
|----|-----|----------------------------|
| 20 | No  |                            |
| 21 | No  |                            |
| 23 | Yes | Hypertension               |
| 24 | No  |                            |
| 25 | No  |                            |
| 26 | No  |                            |
| 27 | No  |                            |
| 28 | Yes | Chronic ulcerative colitis |
| 29 | Yes | Chronic hives              |
| 30 | No  |                            |

### S2.3 - Allergies

Table S2.3 – Information regarding the subject' allergies

| Subject ID | Allergies                          |                  |                                                                    |                  |
|------------|------------------------------------|------------------|--------------------------------------------------------------------|------------------|
|            | Do you have any diagnosed allergy? | If yes, specify: | Have you ever had any allergy or intolerance to [cosmetic products | If yes, specify: |

|    |     |               | or medicines]? |  |
|----|-----|---------------|----------------|--|
| 1  | No  |               | No             |  |
| 2  | No  |               | No             |  |
| 4  | No  |               | No             |  |
| 5  | No  |               | No             |  |
| 6  | No  |               | No             |  |
| 9  | Yes | Rhodium       | No             |  |
| 12 | No  |               | No             |  |
| 13 | No  |               | No             |  |
| 14 | No  |               | No             |  |
| 15 | No  |               | No             |  |
| 16 | No  |               | No             |  |
| 18 | No  |               | No             |  |
| 19 | Yes | Fleas         | No             |  |
| 20 | No  |               | No             |  |
| 21 | Yes | Milk          | No             |  |
| 23 | Yes | Penicillin    | No             |  |
| 24 | No  |               | No             |  |
| 25 | Yes | Metals, sweat | No             |  |



|    |     |                    |     |                        |
|----|-----|--------------------|-----|------------------------|
| 26 | Yes | Pets' hair, Pollen | Yes | Product with retinoids |
| 27 | No  |                    | No  |                        |
| 28 | No  |                    | No  |                        |
| 29 | Yes | Dust               | No  |                        |
| 30 | No  |                    | No  |                        |

#### S2.4 – Exposure to sunlight, UV light and pollution

Table S2.4 – Information regarding the subject' exposure to sunlight, UV light and pollution

| Subject ID | Exposure to sunlight, UV light and pollution |                         |                                                                                  |
|------------|----------------------------------------------|-------------------------|----------------------------------------------------------------------------------|
|            | Daily sunlight exposure:                     | Frequency of solariums: | Frequency of locals with high levels of pollution (eg.: a lot of smoke or dust): |
| 1          | Rare                                         | Null                    | Rare                                                                             |
| 2          | Rare                                         | Null                    | Rare                                                                             |
| 4          | Rare                                         | Null                    | Rare                                                                             |
| 5          | Rare                                         | Null                    | Rare                                                                             |
| 6          | Rare                                         | Null                    | Rare                                                                             |
| 9          | Sporadic                                     | Null                    | Rare                                                                             |

|    |          |      |          |
|----|----------|------|----------|
| 12 | Rare     | Null | Rare     |
| 13 | Rare     | Null | Rare     |
| 14 | Rare     | Null | Rare     |
| 15 | Rare     | Null | Rare     |
| 16 | Rare     | Null | Sporadic |
| 18 | Rare     | Null | Rare     |
| 19 | Rare     | Null | Rare     |
| 20 | Rare     | Null | Rare     |
| 21 | Rare     | Null | Rare     |
| 23 | Sporadic | Null | Rare     |
| 24 | Sporadic | Null | Rare     |
| 25 | Rare     | Null | Rare     |
| 26 | Rare     | Null | Rare     |
| 27 | Rare     | Null | Null     |
| 28 | Rare     | Null | Rare     |
| 29 | Sporadic | Null | Null     |
| 30 | Rare     | Null | Rare     |

## S2.5 – Consumption patterns

Table S2.5 – Information regarding the subject' consumption patterns

| Subject ID | Consumption patterns |                                             |                                                                |                       |                |
|------------|----------------------|---------------------------------------------|----------------------------------------------------------------|-----------------------|----------------|
|            | Smoke habits:        | If yes, approximately, for how long (years) | If yes, approximately how many cigarettes do you smoke per day | Alcohol intake:       | Coffee intake: |
| 1          | No                   |                                             |                                                                | Once to twice a month | Never          |
| 2          | No                   |                                             |                                                                | Frequent              | Daily          |
| 4          | No                   |                                             |                                                                | Very rarely or never  | Daily          |
| 5          | No                   |                                             |                                                                | Very rarely or never  | Never          |
| 6          | No                   |                                             |                                                                | Once to twice a week  | Never          |
| 9          | No                   |                                             |                                                                | Very rarely or never  | Daily          |
| 12         | No                   |                                             |                                                                | Once to twice a week  | Daily          |
| 13         | No                   |                                             |                                                                | Once to twice a week  | Daily          |
| 14         | No                   |                                             |                                                                | Very rarely or never  | Never          |
| 15         | No                   |                                             |                                                                | Very rarely or never  | Daily          |
| 16         | Yes                  | 20 years                                    | 5 to 10 days                                                   | Once to twice a week  | Daily          |
| 18         | No                   |                                             |                                                                | Once to twice a month | Never          |
| 19         | No                   |                                             |                                                                | Once to twice a month | Never          |
| 20         | No                   |                                             |                                                                | Very rarely or never  | Never          |

|    |     |          |         |                       |       |
|----|-----|----------|---------|-----------------------|-------|
| 21 | No  |          |         | Once to twice a week  | Daily |
| 23 | No  |          |         | Once to twice a month | Daily |
| 24 | No  |          |         | Once to twice a month | Daily |
| 25 | Yes | 10 years | <5 days | Once to twice a week  | Daily |
| 26 | No  |          |         | Once to twice a month | Daily |
| 27 | No  |          |         | Once to twice a month | Daily |
| 28 | No  |          |         | Once to twice a week  | Daily |
| 29 | No  |          |         | Very rarely or never  | Never |
| 30 | No  |          |         | Once to twice a month | Never |

## S2.6 – Concomitant Medication

Table S2.6 – Information regarding the subject' concomitant medication

| Subject ID | CM No. | Medication name<br>(Record 'specify Generic or Brand' name) | Start Date | Stop Date | Ongoing at the end of the study? | Reason for use (Enter related AE diagnosis, or other reasons for use, e.g. Prophylaxis) | Dose (units) | Route | Frequency |
|------------|--------|-------------------------------------------------------------|------------|-----------|----------------------------------|-----------------------------------------------------------------------------------------|--------------|-------|-----------|
| 14         | 1      | Pulmicort                                                   | NK/NK/2017 | -         | Yes                              | Asthma                                                                                  | 1            | Oral  | 2x/day    |
| 14         | 2      | Bisoprolol                                                  | NK/09/2018 | -         | Yes                              | Hypertension                                                                            | 1            | Oral  | 1x/day    |
| 15         | 1      | Minigeste                                                   | NK/09/2011 | -         | Yes                              | Contraceptive                                                                           | 1            | Oral  | 1x/day    |
| 16         | 1      | Diplexil                                                    | NK/NK/1999 | -         | Yes                              | Bipolar disorder                                                                        | 1            | Oral  | 1x/day    |
| 16         | 2      | Seroquel                                                    | NK/09/2009 | -         | Yes                              | Bipolar disorder                                                                        | 1            | Oral  | 1x/day    |
| 16         | 3      | Triminulet                                                  | NK/NK/2010 | -         | Yes                              | Contraceptive                                                                           | 1            | Oral  | 1x/day    |
| 18         | 1      | Gynera                                                      | NK/NK/2002 | -         | Yes                              | Contraceptive                                                                           | 1            | Oral  | 1x/day    |
| 23         | 1      | Indapamide 1.5 mg                                           | NK/02/2019 | -         | Yes                              | Hypertension                                                                            | 1            | Oral  | 1x/day    |
| 23         | 1      | Azalia                                                      | NK/11/2018 | -         | Yes                              | Contraceptive                                                                           | 1            | Oral  | 1x/day    |

|    |   |                   |            |   |     |                            |   |         |                |
|----|---|-------------------|------------|---|-----|----------------------------|---|---------|----------------|
|    |   |                   |            |   |     | e                          |   |         |                |
| 25 | 1 | Minigeste         | NK/NK/2009 | - | Yes | Contraceptive              | 1 | Oral    | 1x/day         |
| 26 | 1 | Benzoyl Peroxide  | 15/10/2019 | - | Yes | Acne                       | 1 | Topical | 1x/day         |
| 28 | 1 | Budenofalk        | NK/NK/2016 | - | Yes | Chronic ulcerative colitis | 1 | Rectal  | Every two days |
| 29 | 1 | Yaz               | 01/10/2017 | - | Yes | Contraceptive              | 1 | Oral    | 1x/day         |
| 29 | 2 | Atarax            | 01/02/2019 | - | Yes | Rhinitis                   | 1 | Oral    | 1x/day         |
| 29 | 3 | Bisoprolol 2.5 mg | 15/09/2019 | - | Yes | Tachycardia                | 1 | Oral    | 1x/day         |
| 30 | 1 | Daylette          | NK/NK/2010 | - | Yes | Contraceptive              | 1 | Oral    | 1x/day         |

### Supplementary Material SIII – Products weight

#### analysis S3.1 - Investigational Products Weight

Table S3.1 – Information regarding the F4 weight

| F4         |             |                   |
|------------|-------------|-------------------|
| Subject ID | Product No. | Weight at t0 (mg) |
| 1          | 1           | 13.9              |

|    |   |      |
|----|---|------|
| 2  | 1 | 13.9 |
| 4  | 1 | 14.2 |
| 5  | 1 | 13.9 |
| 6  | 1 | 14.0 |
| 9  | 1 | 14.1 |
| 12 | 1 | 14.0 |
| 13 | 1 | 14.0 |
| 14 | 1 | 13.9 |
| 15 | 1 | 13.9 |
| 16 | 1 | 14.1 |
| 18 | 1 | 14.0 |
| 19 | 1 | 14.0 |
| 20 | 1 | 14.1 |
| 21 | 1 | 14.1 |
| 23 | 1 | 13.9 |
| 24 | 1 | 14.0 |
| 25 | 1 | 13.9 |
| 26 | 1 | 14.0 |
| 27 | 1 | 13.9 |
| 28 | 1 | 14.1 |
| 29 | 1 | 13.9 |
| 30 | 1 | 13.9 |

Table S3.2 – Information regarding the F1 weight

| Product F1 |             |                   |
|------------|-------------|-------------------|
| Subject ID | Product No. | Weight at t0 (mg) |
| 1          | 1           | 13.9              |
| 2          | 1           | 14.0              |
| 4          | 1           | 13.9              |
| 5          | 1           | 14.0              |
| 6          | 1           | 14.0              |
| 9          | 1           | 14.0              |
| 12         | 1           | 13.9              |
| 13         | 1           | 14.1              |
| 14         | 1           | 14.0              |
| 15         | 1           | 14.1              |
| 16         | 1           | 14.1              |



|    |   |      |
|----|---|------|
| 18 | 1 | 13.9 |
| 19 | 1 | 13.9 |
| 20 | 1 | 13.9 |
| 21 | 1 | 14.1 |
| 23 | 1 | 13.9 |
| 24 | 1 | 13.9 |
| 25 | 1 | 14.1 |
| 26 | 1 | 14.0 |
| 27 | 1 | 14.1 |
| 28 | 1 | 13.9 |
| 29 | 1 | 13.9 |
| 30 | 1 | 13.9 |

Table S3.3 – Information regarding the F2 weight

| F2         |             |                   |
|------------|-------------|-------------------|
| Subject ID | Product No. | Weight at t0 (mg) |
| 1          | 1           | 14.1              |
| 2          | 1           | 13.9              |
| 4          | 1           | 14.0              |
| 5          | 1           | 13.9              |
| 6          | 1           | 14.1              |
| 9          | 1           | 13.9              |
| 12         | 1           | 14.1              |
| 13         | 1           | 13.9              |
| 14         | 1           | 13.9              |
| 15         | 1           | 14.1              |
| 16         | 1           | 13.9              |
| 18         | 1           | 13.9              |

|    |   |      |
|----|---|------|
| 19 | 1 | 13.9 |
| 20 | 1 | 14.1 |
| 21 | 1 | 13.9 |
| 23 | 1 | 13.9 |
| 24 | 1 | 14.0 |
| 25 | 1 | 13.9 |
| 26 | 1 | 14.1 |
| 27 | 1 | 14.1 |
| 28 | 1 | 14.0 |
| 29 | 1 | 14.1 |
| 30 | 1 | 14.0 |

Table S3.4 – Information regarding the F3 weight

| F3         |             |                   |
|------------|-------------|-------------------|
| Subject ID | Product No. | Weight at t0 (mg) |
| 1          | 1           | 14.0              |
| 2          | 1           | 14.1              |
| 4          | 1           | 14.1              |
| 5          | 1           | 14.1              |
| 6          | 1           | 13.9              |
| 9          | 1           | 14.1              |
| 12         | 1           | 13.9              |
| 13         | 1           | 13.9              |
| 14         | 1           | 14.1              |
| 15         | 1           | 13.9              |

|    |   |      |
|----|---|------|
| 16 | 1 | 14.0 |
| 18 | 1 | 13.9 |
| 19 | 1 | 13.9 |
| 20 | 1 | 14.1 |
| 21 | 1 | 14.0 |
| 23 | 1 | 14.0 |
| 24 | 1 | 14.1 |
| 25 | 1 | 14.1 |
| 26 | 1 | 14.1 |
| 27 | 1 | 14.0 |
| 28 | 1 | 14.1 |
| 29 | 1 | 14.0 |
| 30 | 1 | 13.9 |

## Supplementary Material SIV – Temperature and relative humidity in vivo

### assay S4.1 – Temperature and relative humidity

Table S4.1 – Information regarding the temperature (°C)

| Subject ID | T0*  | T0** | T24     |
|------------|------|------|---------|
| 1          | 22.0 | -    | 23.9*** |
| 2          | 23.7 | 23.7 | 23.5    |

|                                                                                                                                                                                                                                                                                                                 |      |      |         |
|-----------------------------------------------------------------------------------------------------------------------------------------------------------------------------------------------------------------------------------------------------------------------------------------------------------------|------|------|---------|
| 4                                                                                                                                                                                                                                                                                                               | 22.0 | .    | 24.0*** |
| 5                                                                                                                                                                                                                                                                                                               | 23.3 | 23.3 | 23.6    |
| 6                                                                                                                                                                                                                                                                                                               | 22.5 | -    | 23.9*** |
| 9                                                                                                                                                                                                                                                                                                               | 24.0 | 24.0 | 23.7    |
| 12                                                                                                                                                                                                                                                                                                              | 22.4 | -    | 23.8*** |
| 13                                                                                                                                                                                                                                                                                                              | 23.7 | 23.7 | 23.7    |
| 14                                                                                                                                                                                                                                                                                                              | 22.2 | 22.2 | 24.9*** |
| 15                                                                                                                                                                                                                                                                                                              | 23.4 | 23.4 | 23.6    |
| 16                                                                                                                                                                                                                                                                                                              | 23.7 | 23.7 | 23.9    |
| 18                                                                                                                                                                                                                                                                                                              | 23.1 | 23.1 | 23.3    |
| 19                                                                                                                                                                                                                                                                                                              | 22.3 | -    | 24.0*** |
| 20                                                                                                                                                                                                                                                                                                              | 24.0 | 24.0 | 23.8    |
| 21                                                                                                                                                                                                                                                                                                              | 22.9 | 22.9 | 23.5    |
| 23                                                                                                                                                                                                                                                                                                              | 23.9 | 23.9 | 23.9    |
| 24                                                                                                                                                                                                                                                                                                              | 23.5 | 23.5 | 23.6    |
| 25                                                                                                                                                                                                                                                                                                              | -    | 24.0 | 24.6    |
| 26                                                                                                                                                                                                                                                                                                              | -    | 24.0 | 24.8    |
| 27                                                                                                                                                                                                                                                                                                              | -    | 24.0 | 24.5    |
| 28                                                                                                                                                                                                                                                                                                              | -    | 24.0 | 24.3    |
| 29                                                                                                                                                                                                                                                                                                              | -    | 23.9 | 24.0    |
| 30                                                                                                                                                                                                                                                                                                              | -    | 24.0 | 24.3    |
| *1 <sup>st</sup> group values considered for the hydration evaluation of time-points<br>2h, 4h and 8h after products' application<br>** 2 <sup>nd</sup> group: values considered for the hydration evaluation at time-<br>point 24h after products' application<br>***Values not considered for the mean values |      |      |         |

Table S4.2 – Information regarding the relative humidity (%)

| Subject ID | T0*  | T0** | T24     |
|------------|------|------|---------|
| 1          | 59.8 | -    | 45.9*** |
| 2          | 46.8 | 46.8 | 47.3    |
| 4          | 60.0 | -    | 45.4*** |
| 5          | 50.3 | 50.3 | 44.3    |
| 6          | 59.9 | -    | 47.4*** |
| 9          | 45.4 | 45.4 | 46.8    |
| 12         | 59.9 | -    | 48.4*** |
| 13         | 46.8 | 46.8 | 47.4    |
| 14         | 60.0 | -    | 45.4*** |
| 15         | 49.3 | 49.3 | 47.3    |
| 16         | 46.8 | 46.8 | 47.4    |
| 18         | 50.3 | 50.3 | 44.2    |
| 19         | 59.9 | -    | 47.4*** |
| 20         | 45.4 | 45.4 | 46.9    |
| 21         | 52.3 | 52.3 | 46.3    |
| 23         | 46.9 | 46.9 | 47.4    |
| 24         | 46.4 | 46.4 | 46.3    |
| 25         | -    | 59.9 | 60.9    |
| 26         | -    | 60.0 | 61.1    |
| 27         | -    | 59.1 | 61.0    |
| 28         | -    | 59.1 | 62.0    |
| 29         | -    | 60.0 | 59.2    |
| 30         | -    | 60.0 | 60.9    |

\*1<sup>st</sup> group values considered for the hydration evaluation of time-points 2h, 4h and 8h after products' application  
 \*\* 2<sup>nd</sup> group: values considered for the hydration evaluation at time-point 24h after products' application  
 \*\*\*Values not considered for the mean values

Table S4.3 – Information regarding the raw data temperature (°C)

| Subject ID | T0*  | T0** | T2   | T4   | T8   | T24     |
|------------|------|------|------|------|------|---------|
| 1          | 22.7 | -    | 23.3 | 23.7 | 23.7 | 23.9*** |
| 2          | 23.9 | 23.9 | 23.3 | 23.1 | 23.2 | 23.8    |
| 4          | 23.5 | -    | 23.6 | 23.6 | 23.4 | 23.4*** |
| 5          | 23.7 | 23.7 | 23.8 | 23.6 | 23.6 | 23.5    |
| 6          | 23.8 | -    | 23.8 | 23.8 | 23.0 | 23.8*** |
| 9          | 23.6 | 23.6 | 23.7 | 23.2 | 23.8 | 23.9    |
| 12         | 24.0 | -    | 23.9 | 23.8 | 23.3 | 23.7*** |
| 13         | 24.0 | 24.0 | 23.3 | 23.3 | 23.6 | 23.6    |
| 14         | 23.8 | -    | 23.6 | 23.8 | 23.4 | 23.8*** |
| 15         | 23.6 | 23.6 | 24.0 | 23.7 | 23.4 | 23.9    |
| 16         | 23.9 | 23.9 | 23.3 | 23.3 | 23.8 | 24.0    |
| 18         | 23.3 | 23.3 | 23.7 | 23.5 | 23.3 | 23.6    |
| 19         | 23.9 | -    | 23.7 | 24.0 | 23.0 | 24.0*** |
| 20         | 23.7 | 23.7 | 23.8 | 23.4 | 23.8 | 24.0    |
| 21         | 23.6 | 23.6 | 23.8 | 23.7 | 23.8 | 23.5    |
| 23         | 23.7 | 23.7 | 23.6 | 23.4 | 23.9 | 24.0    |
| 24         | 24.0 | 24.0 | 23.6 | 23.4 | 23.8 | 23.8    |
| 25         | -    | 24.0 | -    | -    | -    | 24.5    |
| 26         | -    | 23.6 | -    | -    | -    | 25.3    |
| 27         | -    | 24.0 | -    | -    | -    | 24.5    |

|                                                                                                                                                                                                                                                                                                          |   |      |   |   |   |      |
|----------------------------------------------------------------------------------------------------------------------------------------------------------------------------------------------------------------------------------------------------------------------------------------------------------|---|------|---|---|---|------|
| 28                                                                                                                                                                                                                                                                                                       | - | 23.4 | - | - | - | 25.0 |
| 29                                                                                                                                                                                                                                                                                                       | - | 23.6 | - | - | - | 25.3 |
| 30                                                                                                                                                                                                                                                                                                       | - | 24.0 | - | - | - | 24.6 |
| *1 <sup>st</sup> group values considered for the hydration evaluation of time-points 2h, 4h and 8h after products' application<br>** 2 <sup>nd</sup> group: values considered for the hydration evaluation at time-point 24h after products' application<br>***Values not considered for the mean values |   |      |   |   |   |      |

Table S4.4 – Information regarding the raw data relative humidity (%)

| Subject ID | T0*  | T0** | T2   | T4   | T8   | T24     |
|------------|------|------|------|------|------|---------|
| 1          | 60.0 | -    | 59.9 | 60.0 | 56.9 | 46.9*** |
| 2          | 46.4 | 46.4 | 46.8 | 50.8 | 50.3 | 46.3    |
| 4          | 59.0 | .    | 59.3 | 59.9 | 56.3 | 46.8*** |
| 5          | 46.8 | 46.8 | 51.4 | 47.3 | 48.4 | 45.8    |
| 6          | 58.7 | .    | 60.0 | 60.0 | 56.2 | 47.4*** |
| 9          | 50.4 | 50.4 | 48.9 | 48.8 | 48.9 | 46.9    |
| 12         | 58.7 | -    | 58.7 | 60.0 | 56.7 | 47.9*** |
| 13         | 46.9 | 46.9 | 47.3 | 50.3 | 49.4 | 46.8    |
| 14         | 58.1 | -    | 59.3 | 59.6 | 56.3 | 46.3*** |
| 15         | 46.3 | 46.3 | 48.4 | 49.4 | 48.3 | 47.4    |
| 16         | 46.4 | 46.4 | 47.3 | 50.3 | 48.4 | 47.4    |
| 18         | 50.3 | 50.3 | 52.4 | 50.9 | 48.3 | 43.8    |
| 19         | 58.2 | -    | 59.1 | 59.5 | 57.3 | 47.4*** |
| 20         | 50.4 | 50.4 | 47.9 | 48.3 | 48.4 | 47.4    |
| 21         | 46.3 | 46.3 | 51.9 | 47.9 | 47.4 | 46.8    |
| 23         | 51.4 | 51.4 | 47.3 | 48.3 | 48.4 | 47.4    |
| 24         | 46.4 | 46.4 | 44.3 | 49.3 | 48.4 | 46.3    |

|                                                                                                                                                                                                                                                                                                          |   |      |   |   |   |      |
|----------------------------------------------------------------------------------------------------------------------------------------------------------------------------------------------------------------------------------------------------------------------------------------------------------|---|------|---|---|---|------|
| 25                                                                                                                                                                                                                                                                                                       | - | 60.0 | - | - | - | 64.0 |
| 26                                                                                                                                                                                                                                                                                                       | - | 57.3 | - | - | - | 60.0 |
| 27                                                                                                                                                                                                                                                                                                       | - | 59.1 | - | - | - | 63.0 |
| 28                                                                                                                                                                                                                                                                                                       | - | 60.0 | - | - | - | 62.0 |
| 29                                                                                                                                                                                                                                                                                                       | - | 60.0 | - | - | - | 57.5 |
| 30                                                                                                                                                                                                                                                                                                       | - | 58.4 | - | - | - | 64.0 |
| *1 <sup>st</sup> group values considered for the hydration evaluation of time-points 2h, 4h and 8h after products' application<br>** 2 <sup>nd</sup> group: values considered for the hydration evaluation at time-point 24h after products' application<br>***Values not considered for the mean values |   |      |   |   |   |      |

Table S4.5. Mean temperature and relative humidity values recorded during the acclimatization period

|                                                                                                                                                                                                                                                          | T0*    |        | T00**  |        | T24    |        |
|----------------------------------------------------------------------------------------------------------------------------------------------------------------------------------------------------------------------------------------------------------|--------|--------|--------|--------|--------|--------|
|                                                                                                                                                                                                                                                          | T (°C) | RH (%) | T (°C) | RH (%) | T (°C) | RH (%) |
| Mean                                                                                                                                                                                                                                                     | 23.1   | 52.1   | 23.6   | 52.0   | 23.9   | 51.6   |
| SD                                                                                                                                                                                                                                                       | 0.7    | 6.2    | 0.5    | 6.1    | 0.4    | 7.1    |
| * 1 <sup>st</sup> group: values considered for the hydration evaluation at time-points 2, 4 and 8 h after product applications<br>* 2 <sup>nd</sup> group: values considered for the hydration evaluation at time-point 24 h after products' application |        |        |        |        |        |        |

Table S4.6. Mean temperature and relative humidity values recorded during the measurements



|                                                                                                                | T0*    |        | T00**  |        | T2*    |        | T4*    |        | T8*    |        | T24**  |        |
|----------------------------------------------------------------------------------------------------------------|--------|--------|--------|--------|--------|--------|--------|--------|--------|--------|--------|--------|
|                                                                                                                | T (°C) | RH (%) |
| Mean                                                                                                           | 23.7   | 51.8   | 23.7   | 51.9   | 23.6   | 52.4   | 23.5   | 53.0   | 23.5   | 51.4   | 24.2   | 51.9   |
| SD                                                                                                             | 0.3    | 5.6    | 0.2    | 5.8    | 0.2    | 5.7    | 0.2    | 5.3    | 0.3    | 4.0    | 0.6    | 7.7    |
| * 1st group: values considered for the hydration evaluation at time-points 2, 4 and 8 h after product' applica |        |        |        |        |        |        |        |        |        |        |        |        |
| * 2nd group: values considered for the hydration evaluation at time-point 24 h after products' application     |        |        |        |        |        |        |        |        |        |        |        |        |

## Supplementary Material SV – Skin hydration results

### S5.1 – Hydration values

Table S4.1 – Information regarding the hydration (A.U.) values from all the subjects at time zero (T0), and .after application of the product A, 2h, 4h, 8h and 24h.

| CTR+    |       |       |       |       |       |
|---------|-------|-------|-------|-------|-------|
| Subject | t0    | t2    | t4    | t8    | t24   |
| 1       | 27.60 | 77.10 | 76.00 | 75.80 | 24.40 |
| 1       | 24.50 | 76.00 | 76.20 | 76.00 | 18.30 |
| 1       | 35.00 | 76.00 | 76.30 | 77.30 | 27.70 |
| 2       | 32.60 | 81.50 | 77.90 | 84.40 | 44.00 |

|    |       |       |       |       |       |
|----|-------|-------|-------|-------|-------|
| 2  | 36.00 | 76.90 | 78.70 | 80.60 | 48.20 |
| 2  | 35.00 | 77.00 | 85.80 | 79.80 | 51.80 |
| 4  | 37.70 | 76.40 | 77.70 | 75.50 | 39.80 |
| 4  | 38.70 | 76.10 | 75.80 | 76.40 | 42.00 |
| 4  | 36.90 | 76.10 | 76.00 | 77.40 | 39.60 |
| 5  | 18.60 | 78.10 | 77.60 | 37.10 | 33.50 |
| 5  | 21.60 | 77.30 | 77.30 | 38.30 | 30.10 |
| 5  | 23.30 | 77.40 | 78.80 | 40.10 | 34.10 |
| 6  | 27.70 | 76.10 | 76.40 | 89.80 | 33.00 |
| 6  | 22.90 | 76.30 | 76.30 | 85.60 | 34.40 |
| 6  | 23.60 | 76.30 | 76.50 | 73.60 | 41.00 |
| 9  | 33.90 | 77.00 | 61.80 | 75.40 | 32.90 |
| 9  | 34.10 | 69.20 | 72.70 | 77.10 | 36.60 |
| 9  | 31.30 | 72.50 | 69.00 | 79.40 | 35.70 |
| 12 | 34.70 | 76.10 | 76.40 | 82.30 | 41.20 |
| 12 | 36.80 | 76.10 | 76.30 | 77.40 | 39.50 |
| 12 | 37.30 | 76.10 | 76.30 | 78.20 | 43.50 |
| 13 | 26.70 | 40.90 | 37.10 | 41.30 | 34.90 |
| 13 | 26.80 | 40.00 | 36.30 | 41.80 | 30.20 |
| 13 | 28.20 | 41.10 | 40.90 | 41.80 | 34.30 |
| 14 | 28.30 | 76.40 | 69.50 | 75.10 | 29.70 |
| 14 | 31.30 | 80.50 | 74.90 | 73.20 | 35.40 |
| 14 | 29.20 | 76.30 | 73.20 | 69.30 | 30.70 |

|    |       |       |       |       |       |
|----|-------|-------|-------|-------|-------|
| 15 | 15.40 | 29.50 | 25.70 | 26.40 | 17.90 |
| 15 | 16.80 | 36.20 | 30.50 | 29.50 | 22.20 |
| 15 | 13.80 | 31.50 | 29.50 | 26.60 | 21.00 |
| 16 | 31.70 | 76.90 | 89.60 | 69.00 | 44.60 |
| 16 | 33.00 | 77.60 | 75.20 | 71.90 | 40.90 |
| 16 | 32.90 | 84.30 | 73.50 | 76.40 | 39.50 |
| 18 | 27.90 | 76.80 | 74.40 | 37.60 | 32.50 |
| 18 | 26.80 | 76.90 | 77.60 | 37.20 | 33.30 |
| 18 | 28.40 | 77.00 | 77.10 | 45.80 | 36.40 |

| CTR+    |       |       |       |       |       |
|---------|-------|-------|-------|-------|-------|
| Subject | t0    | t2    | t4    | t8    | t24   |
| 19      | 28.70 | 76.40 | 76.10 | 74.90 | 31.20 |
| 19      | 30.30 | 76.20 | 77.00 | 72.60 | 33.10 |
| 19      | 30.10 | 76.40 | 76.40 | 68.80 | 30.70 |
| 20      | 28.80 | 68.40 | 74.20 | 90.30 | 31.20 |
| 20      | 31.10 | 77.10 | 78.00 | 85.20 | 36.90 |
| 20      | 31.30 | 77.10 | 77.40 | 83.40 | 40.00 |
| 21      | 28.00 | 76.60 | 39.90 | 33.80 | 32.30 |
| 21      | 25.00 | 65.20 | 41.30 | 32.40 | 33.60 |

|    |       |       |       |       |       |
|----|-------|-------|-------|-------|-------|
| 21 | 26.00 | 76.70 | 43.20 | 38.10 | 36.00 |
| 23 | 18.60 | 37.60 | 27.90 | 30.30 | 25.50 |
| 23 | 15.50 | 34.00 | 23.40 | 30.30 | 26.00 |
| 23 | 17.80 | 37.90 | 24.50 | 32.70 | 29.60 |
| 24 | 37.10 | 77.10 | 88.30 | 71.10 | 39.40 |
| 24 | 34.70 | 77.10 | 97.40 | 63.20 | 41.70 |
| 24 | 36.60 | 77.00 | 79.20 | 68.50 | 43.60 |
| 25 | 38.70 | -     | -     | -     | 35.60 |
| 25 | 39.30 | -     | -     | -     | 34.90 |
| 25 | 40.30 | -     | -     | -     | 36.90 |
| 26 | 30.80 | -     | -     | -     | 84.00 |
| 26 | 28.70 | -     | -     | -     | 83.20 |
| 26 | 32.40 | -     | -     | -     | 82.20 |
| 27 | 19.00 | -     | -     | -     | 26.30 |
| 27 | 17.30 | -     | -     | -     | 26.50 |
| 27 | 18.50 | -     | -     | -     | 27.80 |
| 28 | 23.10 | -     | -     | -     | 34.10 |
| 28 | 27.50 | -     | -     | -     | 37.60 |
| 28 | 26.60 | -     | -     | -     | 39.80 |
| 29 | 29.10 | -     | -     | -     | 33.70 |
| 29 | 25.80 | -     | -     | -     | 33.10 |
| 29 | 24.50 | -     | -     | -     | 36.10 |
| 30 | 35.90 | -     | -     | -     | 46.20 |

|    |       |   |   |   |       |
|----|-------|---|---|---|-------|
| 30 | 35.50 | - | - | - | 49.30 |
| 30 | 38.80 | - | - | - | 53.80 |

Table S5.2 – Data analysis AADE of the hydration values from all the subjects at time zero (T0), and .after application of the CTR+, 2h, 4h, 8h and 24h.

| CTR+    |       |       |       |       |       |       |
|---------|-------|-------|-------|-------|-------|-------|
| Subject | t0*   | t0**  | t2*   | t4*   | t8*   | t24** |
| 1       | 27.60 | -     | 77.10 | 76.00 | 75.80 | -     |
| 1       | 24.50 | -     | 76.00 | 76.20 | 76.00 | -     |
| 1       | 35.00 | -     | 76.00 | 76.30 | 77.30 | -     |
| 2       | 32.60 | 32.60 | 81.50 | 77.90 | 84.40 | 44.00 |
| 2       | 36.00 | 36.00 | 76.90 | 78.70 | 80.60 | 48.20 |
| 2       | 35.00 | 35.00 | 77.00 | 85.80 | 79.80 | 51.80 |
| 4       | 37.70 | -     | 76.40 | 77.70 | 75.50 | -     |
| 4       | 38.70 | -     | 76.10 | 75.80 | 76.40 | -     |
| 4       | 36.90 | -     | 76.10 | 76.00 | 77.40 | -     |
| 5       | 18.60 | 18.60 | 78.10 | 77.60 | 37.10 | 33.50 |
| 5       | 21.60 | 21.60 | 77.30 | 77.30 | 38.30 | 30.10 |
| 5       | 23.30 | 23.30 | 77.40 | 78.80 | 40.10 | 34.10 |
| 6       | 27.70 | -     | 76.10 | 76.40 | 89.80 | -     |
| 6       | 22.90 | -     | 76.30 | 76.30 | 85.60 | -     |
| 6       | 23.60 | -     | 76.30 | 76.50 | 73.60 | -     |

|    |       |       |       |       |       |       |
|----|-------|-------|-------|-------|-------|-------|
| 9  | 33.90 | 33.90 | 77.00 | 61.80 | 75.40 | 32.90 |
| 9  | 34.10 | 34.10 | 69.20 | 72.70 | 77.10 | 36.60 |
| 9  | 31.30 | 31.30 | 72.50 | 69.00 | 79.40 | 35.70 |
| 12 | 34.70 | -     | 76.10 | 76.40 | 82.30 | -     |
| 12 | 36.80 | -     | 76.10 | 76.30 | 77.40 | -     |
| 12 | 37.30 | -     | 76.10 | 76.30 | 78.20 | -     |
| 13 | 26.70 | 26.70 | 40.90 | 37.10 | 41.30 | 34.90 |
| 13 | 26.80 | 26.80 | 40.00 | 36.30 | 41.80 | 30.20 |
| 13 | 28.20 | 28.20 | 41.10 | 40.90 | 41.80 | 34.30 |
| 14 | 28.30 | -     | 76.40 | 69.50 | 75.10 | -     |
| 14 | 31.30 | -     | 80.50 | 74.90 | 73.20 | -     |
| 14 | 29.20 | -     | 76.30 | 73.20 | 69.30 | -     |
| 15 | 15.40 | 15.40 | 29.50 | 25.70 | 26.40 | 17.90 |
| 15 | 16.80 | 16.80 | 36.20 | 30.50 | 29.50 | 22.20 |
| 15 | 13.80 | 13.80 | 31.50 | 29.50 | 26.60 | 21.00 |
| 16 | 31.70 | 31.70 | 76.90 | 89.60 | 69.00 | 44.60 |
| 16 | 33.00 | 33.00 | 77.60 | 75.20 | 71.90 | 40.90 |
| 16 | 32.90 | 32.90 | 84.30 | 73.50 | 76.40 | 39.50 |
| 18 | 27.90 | 27.90 | 76.80 | 74.40 | 37.60 | 32.50 |
| 18 | 26.80 | 26.80 | 76.90 | 77.60 | 37.20 | 33.30 |
| 18 | 28.40 | 28.40 | 77.00 | 77.10 | 45.80 | 36.40 |
| 19 | 28.70 | -     | 76.40 | 76.10 | 74.90 | -     |

| CTR+    |       |       |       |       |       |       |
|---------|-------|-------|-------|-------|-------|-------|
| Subject | t0*   | t0**  | t2*   | t4*   | t8*   | t24** |
| 19      | 30.30 | -     | 76.20 | 77.00 | 72.60 | -     |
| 19      | 30.10 | -     | 76.40 | 76.40 | 68.80 | -     |
| 20      | 28.80 | 28.80 | 68.40 | 74.20 | 90.30 | 31.20 |
| 20      | 31.10 | 31.10 | 77.10 | 78.00 | 85.20 | 36.90 |
| 20      | 31.30 | 31.30 | 77.10 | 77.40 | 83.40 | 40.00 |
| 21      | 28.00 | 28.00 | 76.60 | 39.90 | 33.80 | 32.30 |
| 21      | 25.00 | 25.00 | 65.20 | 41.30 | 32.40 | 33.60 |
| 21      | 26.00 | 26.00 | 76.70 | 43.20 | 38.10 | 36.00 |
| 23      | 18.60 | 18.60 | 37.60 | 27.90 | 30.30 | 25.50 |
| 23      | 15.50 | 15.50 | 34.00 | 23.40 | 30.30 | 26.00 |
| 23      | 17.80 | 17.80 | 37.90 | 24.50 | 32.70 | 29.60 |
| 24      | 37.10 | 37.10 | 77.10 | 88.30 | 71.10 | 39.40 |
| 24      | 34.70 | 34.70 | 77.10 | 97.40 | 63.20 | 41.70 |
| 24      | 36.60 | 36.60 | 77.00 | 79.20 | 68.50 | 43.60 |
| 25      | -     | 38.70 | -     | -     | -     | 35.60 |
| 25      | -     | 39.30 | -     | -     | -     | 34.90 |
| 25      | -     | 40.30 | -     | -     | -     | 36.90 |
| 26      | -     | 30.80 | -     | -     | -     | 84.00 |

|                                                                                                                                                                                                                                                                   |   |       |   |   |   |       |
|-------------------------------------------------------------------------------------------------------------------------------------------------------------------------------------------------------------------------------------------------------------------|---|-------|---|---|---|-------|
| 26                                                                                                                                                                                                                                                                | - | 28.70 | - | - | - | 83.20 |
| 26                                                                                                                                                                                                                                                                | - | 32.40 | - | - | - | 82.20 |
| 27                                                                                                                                                                                                                                                                | - | 19.00 | - | - | - | 26.30 |
| 27                                                                                                                                                                                                                                                                | - | 17.30 | - | - | - | 26.50 |
| 27                                                                                                                                                                                                                                                                | - | 18.50 | - | - | - | 27.80 |
| 28                                                                                                                                                                                                                                                                | - | 23.10 | - | - | - | 34.10 |
| 28                                                                                                                                                                                                                                                                | - | 27.50 | - | - | - | 37.60 |
| 28                                                                                                                                                                                                                                                                | - | 26.60 | - | - | - | 39.80 |
| 29                                                                                                                                                                                                                                                                | - | 29.10 | - | - | - | 33.70 |
| 29                                                                                                                                                                                                                                                                | - | 25.80 | - | - | - | 33.10 |
| 29                                                                                                                                                                                                                                                                | - | 24.50 | - | - | - | 36.10 |
| 30                                                                                                                                                                                                                                                                | - | 35.90 | - | - | - | 46.20 |
| 30                                                                                                                                                                                                                                                                | - | 35.50 | - | - | - | 49.30 |
| 30                                                                                                                                                                                                                                                                | - | 38.80 | - | - | - | 53.80 |
| <p>*1<sup>st</sup> group values considered for the hydration evaluation of time-points 2h, 4h and 8h after products' application</p> <p>** 2<sup>nd</sup> group: values considered for the hydration evaluation at time-point 24h after products' application</p> |   |       |   |   |   |       |

Table S5.3 – Information regarding the hydration (A.U.) values from all the subjects at time zero (T0), and .after application of the CTR-, 2h, 4h, 8h and 24h.



| CTR-    |       |       |       |       |       |
|---------|-------|-------|-------|-------|-------|
| Subject | t0    | t2    | t4    | t8    | t24   |
| 1       | 28.50 | 25.80 | 27.70 | 28.20 | 22.80 |
| 1       | 36.50 | 31.90 | 33.20 | 33.40 | 21.60 |
| 1       | 35.80 | 28.20 | 25.10 | 26.00 | 21.70 |
| 2       | 32.00 | 27.60 | 28.10 | 36.20 | 34.00 |
| 2       | 39.20 | 31.10 | 36.30 | 40.90 | 41.50 |
| 2       | 33.40 | 27.20 | 31.20 | 33.00 | 34.80 |
| 4       | 29.50 | 20.10 | 21.40 | 24.50 | 23.60 |
| 4       | 33.80 | 22.50 | 23.00 | 23.00 | 25.60 |
| 4       | 26.70 | 19.70 | 19.80 | 20.60 | 23.10 |
| 5       | 21.10 | 20.40 | 18.90 | 19.20 | 23.10 |
| 5       | 18.70 | 19.30 | 18.60 | 15.90 | 23.90 |
| 5       | 18.10 | 18.50 | 18.00 | 16.10 | 21.00 |
| 6       | 32.50 | 26.30 | 29.70 | 25.70 | 23.30 |
| 6       | 31.40 | 31.80 | 35.50 | 27.80 | 25.60 |
| 6       | 30.50 | 27.90 | 31.20 | 25.20 | 26.00 |
| 9       | 36.60 | 28.00 | 25.10 | 31.90 | 36.50 |
| 9       | 29.80 | 25.20 | 20.20 | 32.10 | 29.90 |
| 9       | 31.10 | 28.40 | 24.00 | 30.90 | 32.30 |
| 12      | 32.90 | 28.60 | 32.00 | 29.30 | 30.00 |
| 12      | 34.60 | 34.10 | 35.10 | 29.60 | 36.30 |

|    |       |       |       |       |       |
|----|-------|-------|-------|-------|-------|
| 12 | 33.80 | 26.60 | 30.60 | 27.10 | 27.90 |
| 13 | 22.20 | 23.20 | 23.10 | 27.00 | 22.30 |
| 13 | 21.30 | 21.60 | 23.70 | 26.90 | 20.40 |
| 13 | 20.80 | 20.50 | 21.80 | 28.80 | 26.80 |
| 14 | 33.80 | 26.20 | 26.60 | 26.40 | 28.80 |
| 14 | 35.40 | 30.00 | 27.90 | 28.70 | 31.00 |
| 14 | 33.90 | 23.80 | 22.90 | 23.70 | 27.00 |
| 15 | 21.00 | 21.30 | 19.20 | 17.70 | 21.50 |
| 15 | 13.50 | 16.90 | 16.00 | 17.80 | 16.20 |
| 15 | 19.20 | 20.20 | 18.80 | 18.40 | 21.70 |
| 16 | 31.00 | 28.80 | 24.90 | 30.80 | 28.80 |
| 16 | 30.10 | 27.00 | 26.80 | 30.30 | 26.70 |
| 16 | 30.90 | 27.10 | 25.90 | 32.20 | 25.10 |
| 18 | 23.30 | 22.50 | 20.60 | 17.00 | 22.30 |
| 18 | 20.70 | 25.00 | 20.00 | 19.80 | 25.30 |
| 18 | 23.70 | 22.70 | 18.10 | 18.70 | 24.40 |

| CTR-    |       |       |       |       |       |
|---------|-------|-------|-------|-------|-------|
| Subject | t0    | t2    | t4    | t8    | t24   |
| 19      | 22.10 | 20.30 | 25.00 | 18.00 | 22.90 |
| 19      | 27.20 | 21.20 | 22.10 | 18.30 | 18.20 |

|    |       |       |       |       |       |
|----|-------|-------|-------|-------|-------|
| 19 | 24.60 | 21.80 | 24.40 | 14.00 | 19.10 |
| 20 | 28.20 | 27.70 | 22.80 | 28.40 | 25.60 |
| 20 | 33.30 | 26.50 | 23.20 | 31.10 | 25.60 |
| 20 | 29.50 | 28.40 | 25.70 | 28.60 | 26.00 |
| 21 | 22.40 | 25.60 | 21.40 | 21.60 | 29.60 |
| 21 | 19.90 | 23.70 | 20.10 | 19.00 | 22.20 |
| 21 | 18.00 | 25.60 | 20.10 | 17.00 | 25.60 |
| 23 | 20.00 | 16.00 | 15.50 | 16.30 | 26.30 |
| 23 | 16.50 | 14.00 | 13.20 | 15.40 | 22.90 |
| 23 | 14.70 | 15.20 | 13.70 | 17.50 | 23.40 |
| 24 | 34.30 | 27.00 | 29.80 | 33.50 | 37.90 |
| 24 | 37.00 | 34.30 | 30.70 | 31.90 | 39.30 |
| 24 | 32.30 | 28.30 | 25.70 | 34.20 | 36.70 |
| 25 | 35.10 | -     | -     | -     | 35.80 |
| 25 | 39.70 | -     | -     | -     | 38.00 |
| 25 | 40.50 | -     | -     | -     | 38.00 |
| 26 | 37.10 | -     | -     | -     | 38.40 |
| 26 | 30.30 | -     | -     | -     | 35.10 |
| 26 | 32.00 | -     | -     | -     | 41.60 |
| 27 | 27.10 | -     | -     | -     | 29.30 |
| 27 | 24.10 | -     | -     | -     | 31.90 |
| 27 | 26.50 | -     | -     | -     | 32.10 |
| 28 | 22.40 | -     | -     | -     | 22.60 |

|    |       |   |   |   |       |
|----|-------|---|---|---|-------|
| 28 | 24.20 | - | - | - | 23.50 |
| 28 | 25.20 | - | - | - | 24.40 |
| 29 | 31.40 | - | - | - | 29.00 |
| 29 | 30.80 | - | - | - | 34.70 |
| 29 | 28.00 | - | - | - | 33.00 |
| 30 | 25.20 | - | - | - | 30.70 |
| 30 | 27.00 | - | - | - | 29.30 |
| 30 | 30.90 | - | - | - | 31.10 |

Table S5.4 – Data analysis AADE of the hydration values from all the subjects at time zero (T0), and .after application of the product CTR-, 2h, 4h, 8h and 24h

| CTR-    |       |       |       |       |       |       |
|---------|-------|-------|-------|-------|-------|-------|
| Subject | t0*   | t0**  | t2*   | t4*   | t8*   | t24** |
| 1       | 28.50 | -     | 25.80 | 27.70 | 28.20 | -     |
| 1       | 36.50 | -     | 31.90 | 33.20 | 33.40 | -     |
| 1       | 35.80 | -     | 28.20 | 25.10 | 26.00 | -     |
| 2       | 32.00 | 32.00 | 27.60 | 28.10 | 36.20 | 34.00 |

|    |       |       |       |       |       |       |
|----|-------|-------|-------|-------|-------|-------|
| 2  | 39.20 | 39.20 | 31.10 | 36.30 | 40.90 | 41.50 |
| 2  | 33.40 | 33.40 | 27.20 | 31.20 | 33.00 | 34.80 |
| 4  | 29.50 | -     | 20.10 | 21.40 | 24.50 | -     |
| 4  | 33.80 | -     | 22.50 | 23.00 | 23.00 | -     |
| 4  | 26.70 | -     | 19.70 | 19.80 | 20.60 | -     |
| 5  | 21.10 | 21.10 | 20.40 | 18.90 | 19.20 | 23.10 |
| 5  | 18.70 | 18.70 | 19.30 | 18.60 | 15.90 | 23.90 |
| 5  | 18.10 | 18.10 | 18.50 | 18.00 | 16.10 | 21.00 |
| 6  | 32.50 | -     | 26.30 | 29.70 | 25.70 | -     |
| 6  | 31.40 | -     | 31.80 | 35.50 | 27.80 | -     |
| 6  | 30.50 | -     | 27.90 | 31.20 | 25.20 | -     |
| 9  | 36.60 | 36.60 | 28.00 | 25.10 | 31.90 | 36.50 |
| 9  | 29.80 | 29.80 | 25.20 | 20.20 | 32.10 | 29.90 |
| 9  | 31.10 | 31.10 | 28.40 | 24.00 | 30.90 | 32.30 |
| 12 | 32.90 | -     | 28.60 | 32.00 | 29.30 | -     |
| 12 | 34.60 | -     | 34.10 | 35.10 | 29.60 | -     |
| 12 | 33.80 | -     | 26.60 | 30.60 | 27.10 | -     |
| 13 | 22.20 | 22.20 | 23.20 | 23.10 | 27.00 | 22.30 |
| 13 | 21.30 | 21.30 | 21.60 | 23.70 | 26.90 | 20.40 |
| 13 | 20.80 | 20.80 | 20.50 | 21.80 | 28.80 | 26.80 |
| 14 | 33.80 | -     | 26.20 | 26.60 | 26.40 | -     |
| 14 | 35.40 | -     | 30.00 | 27.90 | 28.70 | -     |
| 14 | 33.90 | -     | 23.80 | 22.90 | 23.70 | -     |

|    |       |       |       |       |       |       |
|----|-------|-------|-------|-------|-------|-------|
| 15 | 21.00 | 21.00 | 21.30 | 19.20 | 17.70 | 21.50 |
| 15 | 13.50 | 13.50 | 16.90 | 16.00 | 17.80 | 16.20 |
| 15 | 19.20 | 19.20 | 20.20 | 18.80 | 18.40 | 21.70 |
| 16 | 31.00 | 31.00 | 28.80 | 24.90 | 30.80 | 28.80 |
| 16 | 30.10 | 30.10 | 27.00 | 26.80 | 30.30 | 26.70 |
| 16 | 30.90 | 30.90 | 27.10 | 25.90 | 32.20 | 25.10 |
| 18 | 23.30 | 23.30 | 22.50 | 20.60 | 17.00 | 22.30 |
| 18 | 20.70 | 20.70 | 25.00 | 20.00 | 19.80 | 25.30 |
| 18 | 23.70 | 23.70 | 22.70 | 18.10 | 18.70 | 24.40 |

| CTR-    |       |       |       |       |       |       |
|---------|-------|-------|-------|-------|-------|-------|
| Subject | t0*   | t0**  | t2*   | t4*   | t8*   | t24** |
| 19      | 22.10 | -     | 20.30 | 25.00 | 18.00 | -     |
| 19      | 27.20 | -     | 21.20 | 22.10 | 18.30 | -     |
| 19      | 24.60 | -     | 21.80 | 24.40 | 14.00 | -     |
| 20      | 28.20 | 28.20 | 27.70 | 22.80 | 28.40 | 25.60 |
| 20      | 33.30 | 33.30 | 26.50 | 23.20 | 31.10 | 25.60 |
| 20      | 29.50 | 29.50 | 28.40 | 25.70 | 28.60 | 26.00 |
| 21      | 22.40 | 22.40 | 25.60 | 21.40 | 21.60 | 29.60 |
| 21      | 19.90 | 19.90 | 23.70 | 20.10 | 19.00 | 22.20 |

|    |       |       |       |       |       |       |
|----|-------|-------|-------|-------|-------|-------|
| 21 | 18.00 | 18.00 | 25.60 | 20.10 | 17.00 | 25.60 |
| 23 | 20.00 | 20.00 | 16.00 | 15.50 | 16.30 | 26.30 |
| 23 | 16.50 | 16.50 | 14.00 | 13.20 | 15.40 | 22.90 |
| 23 | 14.70 | 14.70 | 15.20 | 13.70 | 17.50 | 23.40 |
| 24 | 34.30 | 34.30 | 27.00 | 29.80 | 33.50 | 37.90 |
| 24 | 37.00 | 37.00 | 34.30 | 30.70 | 31.90 | 39.30 |
| 24 | 32.30 | 32.30 | 28.30 | 25.70 | 34.20 | 36.70 |
| 25 | -     | 35.10 | -     | -     | -     | 35.80 |
| 25 | -     | 39.70 | -     | -     | -     | 38.00 |
| 25 | -     | 40.50 | -     | -     | -     | 38.00 |
| 26 | -     | 37.10 | -     | -     | -     | 38.40 |
| 26 | -     | 30.30 | -     | -     | -     | 35.10 |
| 26 | -     | 32.00 | -     | -     | -     | 41.60 |
| 27 | -     | 27.10 | -     | -     | -     | 29.30 |
| 27 | -     | 24.10 | -     | -     | -     | 31.90 |
| 27 | -     | 26.50 | -     | -     | -     | 32.10 |
| 28 | -     | 22.40 | -     | -     | -     | 22.60 |
| 28 | -     | 24.20 | -     | -     | -     | 23.50 |
| 28 | -     | 25.20 | -     | -     | -     | 24.40 |
| 29 | -     | 31.40 | -     | -     | -     | 29.00 |
| 29 | -     | 30.80 | -     | -     | -     | 34.70 |
| 29 | -     | 28.00 | -     | -     | -     | 33.00 |
| 30 | -     | 25.20 | -     | -     | -     | 30.70 |

|                                                                                                                                                                                                                                                                 |   |       |   |   |   |       |
|-----------------------------------------------------------------------------------------------------------------------------------------------------------------------------------------------------------------------------------------------------------------|---|-------|---|---|---|-------|
| 30                                                                                                                                                                                                                                                              | - | 27.00 | - | - | - | 29.30 |
| 30                                                                                                                                                                                                                                                              | - | 30.90 | - | - | - | 31.10 |
| <p>*1st group: values considered for the hydration evaluation at time-points 2 hours, 4 hours and 8 hours after products' application</p> <p>**2nd group: values considered for the hydration evaluation at time-point 24 hours after products' application</p> |   |       |   |   |   |       |

Table S5.5 – Information regarding the hydration (A.U.) values from all the subjects at time zero (T0), and .after application of the F4, 2h, 4h, 8h and 24h.

| F4      |       |       |       |       |       |
|---------|-------|-------|-------|-------|-------|
| Subject | t0    | t2    | t4    | t8    | t24   |
| 1       | 34.60 | 37.40 | 34.10 | 27.50 | 21.00 |
| 1       | 34.10 | 34.20 | 35.70 | 26.30 | 24.00 |
| 1       | 27.90 | 27.60 | 29.70 | 21.30 | 19.70 |
| 2       | 47.10 | 39.80 | 43.10 | 39.70 | 43.30 |
| 2       | 47.30 | 37.20 | 42.10 | 44.30 | 42.40 |
| 2       | 56.10 | 42.10 | 42.60 | 41.20 | 48.00 |
| 4       | 34.40 | 28.60 | 32.00 | 25.60 | 25.50 |
| 4       | 28.50 | 31.70 | 30.50 | 24.90 | 21.00 |
| 4       | 28.60 | 23.00 | 31.90 | 27.70 | 26.00 |



|    |       |       |       |       |       |
|----|-------|-------|-------|-------|-------|
| 5  | 17.10 | 19.60 | 20.90 | 17.30 | 17.60 |
| 5  | 20.60 | 21.80 | 22.70 | 12.90 | 19.50 |
| 5  | 16.20 | 20.40 | 21.00 | 15.20 | 18.90 |
| 6  | 26.80 | 30.80 | 29.70 | 24.70 | 25.10 |
| 6  | 27.90 | 32.00 | 31.30 | 24.40 | 24.50 |
| 6  | 28.40 | 33.60 | 31.40 | 22.60 | 24.70 |
| 9  | 31.40 | 25.20 | 22.80 | 27.00 | 32.30 |
| 9  | 32.20 | 25.00 | 21.70 | 27.70 | 26.50 |
| 9  | 30.00 | 27.10 | 24.20 | 26.60 | 29.80 |
| 12 | 34.90 | 23.00 | 28.10 | 26.20 | 29.30 |
| 12 | 34.80 | 25.70 | 29.50 | 24.80 | 22.90 |
| 12 | 36.30 | 27.70 | 35.00 | 21.40 | 26.70 |
| 13 | 23.40 | 24.50 | 23.70 | 28.90 | 27.10 |
| 13 | 22.10 | 26.50 | 26.90 | 26.60 | 26.50 |
| 13 | 22.20 | 23.20 | 22.90 | 27.60 | 24.00 |
| 14 | 39.30 | 27.10 | 36.20 | 35.30 | 30.70 |
| 14 | 31.70 | 29.90 | 30.20 | 27.20 | 27.90 |
| 14 | 35.10 | 30.20 | 32.60 | 29.70 | 28.60 |
| 15 | 16.10 | 21.30 | 19.50 | 16.00 | 20.80 |
| 15 | 16.10 | 17.10 | 14.70 | 16.40 | 17.00 |
| 15 | 18.90 | 20.40 | 18.30 | 17.00 | 19.50 |
| 16 | 24.20 | 20.80 | 16.80 | 23.50 | 20.10 |
| 16 | 25.00 | 15.30 | 14.50 | 22.40 | 19.00 |

|    |       |       |       |       |       |
|----|-------|-------|-------|-------|-------|
| 16 | 23.80 | 13.70 | 17.50 | 22.70 | 20.00 |
| 18 | 25.20 | 37.30 | 37.80 | 31.70 | 27.30 |
| 18 | 26.80 | 34.20 | 30.50 | 27.10 | 24.50 |
| 18 | 25.50 | 34.80 | 32.10 | 29.20 | 26.30 |
| 19 | 28.10 | 22.60 | 24.90 | 18.00 | 23.60 |

| F4      |       |       |       |       |       |
|---------|-------|-------|-------|-------|-------|
| Subject | t0    | t2    | t4    | t8    | t24   |
| 19      | 25.90 | 20.80 | 23.70 | 22.50 | 21.70 |
| 19      | 22.90 | 21.00 | 21.90 | 16.90 | 18.30 |
| 20      | 33.70 | 32.00 | 30.30 | 36.00 | 39.20 |
| 20      | 32.80 | 32.10 | 31.00 | 39.50 | 36.50 |
| 20      | 31.70 | 26.10 | 31.10 | 33.10 | 33.00 |
| 21      | 23.80 | 18.90 | 18.50 | 20.00 | 24.30 |
| 21      | 25.30 | 24.70 | 25.60 | 22.60 | 27.20 |
| 21      | 27.50 | 24.10 | 20.90 | 24.50 | 25.70 |
| 23      | 15.30 | 14.20 | 13.30 | 21.00 | 17.20 |
| 23      | 18.50 | 13.70 | 11.30 | 20.50 | 19.10 |
| 23      | 16.60 | 16.10 | 11.80 | 20.00 | 16.40 |
| 24      | 35.60 | 32.60 | 33.40 | 38.60 | 32.90 |
| 24      | 33.20 | 32.50 | 28.30 | 37.20 | 33.80 |
| 24      | 34.10 | 34.10 | 35.80 | 39.60 | 36.80 |

|    |       |   |   |   |       |
|----|-------|---|---|---|-------|
| 25 | 36.10 | - | - | - | 29.50 |
| 25 | 33.20 | - | - | - | 26.60 |
| 25 | 39.00 | - | - | - | 32.40 |
| 26 | 35.70 | - | - | - | 41.60 |
| 26 | 28.80 | - | - | - | 41.70 |
| 26 | 33.80 | - | - | - | 49.70 |
| 27 | 28.80 | - | - | - | 37.40 |
| 27 | 27.80 | - | - | - | 38.30 |
| 27 | 35.30 | - | - | - | 31.30 |
| 28 | 28.40 | - | - | - | 30.50 |
| 28 | 27.70 | - | - | - | 31.80 |
| 28 | 34.60 | - | - | - | 31.60 |
| 29 | 30.30 | - | - | - | 29.70 |
| 29 | 26.50 | - | - | - | 34.00 |
| 29 | 27.00 | - | - | - | 32.30 |
| 30 | 24.60 | - | - | - | 26.70 |
| 30 | 27.30 | - | - | - | 26.00 |
| 30 | 26.90 | - | - | - | 25.40 |

Table S5.6 – Data analysis AADE of the hydration values from all the subjects at time zero (T0), and .after application of the F4, 2h, 4h, 8h and 24h.

| F4      |       |       |       |       |       |       |
|---------|-------|-------|-------|-------|-------|-------|
| Subject | t0*   | t0**  | t2*   | t4*   | t8*   | t24** |
| 1       | 34.60 | -     | 37.40 | 34.10 | 27.50 | -     |
| 1       | 34.10 | -     | 34.20 | 35.70 | 26.30 | -     |
| 1       | 27.90 | -     | 27.60 | 29.70 | 21.30 | -     |
| 2       | 47.10 | 47.10 | 39.80 | 43.10 | 39.70 | 43.30 |
| 2       | 47.30 | 47.30 | 37.20 | 42.10 | 44.30 | 42.40 |
| 2       | 56.10 | 56.10 | 42.10 | 42.60 | 41.20 | 48.00 |
| 4       | 34.40 | -     | 28.60 | 32.00 | 25.60 | -     |
| 4       | 28.50 | -     | 31.70 | 30.50 | 24.90 | -     |
| 4       | 28.60 | -     | 23.00 | 31.90 | 27.70 | -     |
| 5       | 17.10 | 17.10 | 19.60 | 20.90 | 17.30 | 17.60 |
| 5       | 20.60 | 20.60 | 21.80 | 22.70 | 12.90 | 19.50 |
| 5       | 16.20 | 16.20 | 20.40 | 21.00 | 15.20 | 18.90 |
| 6       | 26.80 | -     | 30.80 | 29.70 | 24.70 | -     |
| 6       | 27.90 | -     | 32.00 | 31.30 | 24.40 | -     |
| 6       | 28.40 | -     | 33.60 | 31.40 | 22.60 | -     |
| 9       | 31.40 | 31.40 | 25.20 | 22.80 | 27.00 | 32.30 |
| 9       | 32.20 | 32.20 | 25.00 | 21.70 | 27.70 | 26.50 |
| 9       | 30.00 | 30.00 | 27.10 | 24.20 | 26.60 | 29.80 |

|    |       |       |       |       |       |       |
|----|-------|-------|-------|-------|-------|-------|
| 12 | 34.90 | -     | 23.00 | 28.10 | 26.20 | -     |
| 12 | 34.80 | -     | 25.70 | 29.50 | 24.80 | -     |
| 12 | 36.30 | -     | 27.70 | 35.00 | 21.40 | -     |
| 13 | 23.40 | 23.40 | 24.50 | 23.70 | 28.90 | 27.10 |
| 13 | 22.10 | 22.10 | 26.50 | 26.90 | 26.60 | 26.50 |
| 13 | 22.20 | 22.20 | 23.20 | 22.90 | 27.60 | 24.00 |
| 14 | 39.30 | -     | 27.10 | 36.20 | 35.30 | -     |
| 14 | 31.70 | -     | 29.90 | 30.20 | 27.20 | -     |
| 14 | 35.10 | -     | 30.20 | 32.60 | 29.70 | -     |
| 15 | 16.10 | 16.10 | 21.30 | 19.50 | 16.00 | 20.80 |
| 15 | 16.10 | 16.10 | 17.10 | 14.70 | 16.40 | 17.00 |
| 15 | 18.90 | 18.90 | 20.40 | 18.30 | 17.00 | 19.50 |
| 16 | 24.20 | 24.20 | 20.80 | 16.80 | 23.50 | 20.10 |
| 16 | 25.00 | 25.00 | 15.30 | 14.50 | 22.40 | 19.00 |
| 16 | 23.80 | 23.80 | 13.70 | 17.50 | 22.70 | 20.00 |
| 18 | 25.20 | 25.20 | 37.30 | 37.80 | 31.70 | 27.30 |
| 18 | 26.80 | 26.80 | 34.20 | 30.50 | 27.10 | 24.50 |
| 18 | 25.50 | 25.50 | 34.80 | 32.10 | 29.20 | 26.30 |
| 19 | 28.10 | -     | 22.60 | 24.90 | 18.00 | -     |

| F4      |     |      |     |     |     |       |
|---------|-----|------|-----|-----|-----|-------|
| Subject | t0* | t0** | t2* | t4* | t8* | t24** |

|    |       |       |       |       |       |       |
|----|-------|-------|-------|-------|-------|-------|
| 19 | 25.90 | -     | 20.80 | 23.70 | 22.50 | -     |
| 19 | 22.90 | -     | 21.00 | 21.90 | 16.90 | -     |
| 20 | 33.70 | 33.70 | 32.00 | 30.30 | 36.00 | 39.20 |
| 20 | 32.80 | 32.80 | 32.10 | 31.00 | 39.50 | 36.50 |
| 20 | 31.70 | 31.70 | 26.10 | 31.10 | 33.10 | 33.00 |
| 21 | 23.80 | 23.80 | 18.90 | 18.50 | 20.00 | 24.30 |
| 21 | 25.30 | 25.30 | 24.70 | 25.60 | 22.60 | 27.20 |
| 21 | 27.50 | 27.50 | 24.10 | 20.90 | 24.50 | 25.70 |
| 23 | 15.30 | 15.30 | 14.20 | 13.30 | 21.00 | 17.20 |
| 23 | 18.50 | 18.50 | 13.70 | 11.30 | 20.50 | 19.10 |
| 23 | 16.60 | 16.60 | 16.10 | 11.80 | 20.00 | 16.40 |
| 24 | 35.60 | 35.60 | 32.60 | 33.40 | 38.60 | 32.90 |
| 24 | 33.20 | 33.20 | 32.50 | 28.30 | 37.20 | 33.80 |
| 24 | 34.10 | 34.10 | 34.10 | 35.80 | 39.60 | 36.80 |
| 25 | -     | 36.10 | -     | -     | -     | 29.50 |
| 25 | -     | 33.20 | -     | -     | -     | 26.60 |
| 25 | -     | 39.00 | -     | -     | -     | 32.40 |
| 26 | -     | 35.70 | -     | -     | -     | 41.60 |
| 26 | -     | 28.80 | -     | -     | -     | 41.70 |
| 26 | -     | 33.80 | -     | -     | -     | 49.70 |
| 27 | -     | 28.80 | -     | -     | -     | 37.40 |
| 27 | -     | 27.80 | -     | -     | -     | 38.30 |
| 27 | -     | 35.30 | -     | -     | -     | 31.30 |

|                                                                                                                                                                                                                                                                 |   |       |   |   |   |       |
|-----------------------------------------------------------------------------------------------------------------------------------------------------------------------------------------------------------------------------------------------------------------|---|-------|---|---|---|-------|
| 28                                                                                                                                                                                                                                                              | - | 28.40 | - | - | - | 30.50 |
| 28                                                                                                                                                                                                                                                              | - | 27.70 | - | - | - | 31.80 |
| 28                                                                                                                                                                                                                                                              | - | 34.60 | - | - | - | 31.60 |
| 29                                                                                                                                                                                                                                                              | - | 30.30 | - | - | - | 29.70 |
| 29                                                                                                                                                                                                                                                              | - | 26.50 | - | - | - | 34.00 |
| 29                                                                                                                                                                                                                                                              | - | 27.00 | - | - | - | 32.30 |
| 30                                                                                                                                                                                                                                                              | - | 24.60 | - | - | - | 26.70 |
| 30                                                                                                                                                                                                                                                              | - | 27.30 | - | - | - | 26.00 |
| 30                                                                                                                                                                                                                                                              | - | 26.90 | - | - | - | 25.40 |
| <p>*1st group: values considered for the hydration evaluation at time-points 2 hours, 4 hours and 8 hours after products' application</p> <p>**2nd group: values considered for the hydration evaluation at time-point 24 hours after products' application</p> |   |       |   |   |   |       |

Table S5.7 – Information regarding the hydration (A.U.) values from all the subjects at time zero (T0), and .after application of the F1, 2h, 4h, 8h and 24h.

| F1          |       |       |       |       |       |
|-------------|-------|-------|-------|-------|-------|
| Subjec<br>t | t0    | t2    | t4    | t8    | t24   |
| 1           | 40.60 | 31.30 | 32.30 | 29.90 | 28.00 |

|    |       |       |       |       |       |
|----|-------|-------|-------|-------|-------|
| 1  | 37.20 | 25.70 | 24.70 | 24.90 | 21.30 |
| 1  | 39.50 | 31.00 | 31.50 | 29.10 | 28.20 |
| 2  | 38.10 | 24.40 | 28.80 | 33.00 | 34.20 |
| 2  | 32.40 | 24.40 | 25.90 | 31.10 | 29.90 |
| 2  | 36.80 | 23.70 | 27.10 | 32.60 | 32.70 |
| 4  | 38.30 | 36.30 | 35.00 | 37.60 | 32.40 |
| 4  | 44.30 | 33.30 | 37.10 | 34.20 | 30.90 |
| 4  | 37.80 | 32.40 | 34.00 | 35.50 | 32.60 |
| 5  | 23.10 | 28.50 | 27.40 | 24.50 | 23.80 |
| 5  | 19.20 | 27.50 | 24.20 | 18.90 | 18.00 |
| 5  | 20.60 | 25.70 | 21.40 | 18.10 | 20.00 |
| 6  | 28.90 | 35.40 | 39.20 | 25.40 | 24.40 |
| 6  | 25.80 | 30.10 | 38.10 | 27.40 | 24.30 |
| 6  | 27.50 | 32.70 | 38.00 | 24.70 | 27.40 |
| 9  | 33.60 | 32.70 | 28.90 | 32.90 | 34.90 |
| 9  | 29.90 | 28.50 | 21.40 | 27.80 | 25.80 |
| 9  | 32.10 | 31.10 | 29.70 | 35.70 | 32.90 |
| 12 | 31.80 | 37.30 | 36.30 | 25.80 | 30.60 |
| 12 | 33.60 | 28.90 | 29.10 | 26.70 | 27.60 |
| 12 | 28.10 | 34.80 | 33.30 | 22.50 | 28.90 |
| 13 | 20.50 | 20.60 | 24.50 | 22.70 | 20.20 |
| 13 | 22.90 | 21.70 | 23.30 | 28.40 | 24.20 |
| 13 | 23.90 | 20.20 | 20.30 | 28.70 | 22.90 |
| 14 | 36.40 | 26.80 | 30.70 | 25.70 | 20.50 |
| 14 | 28.90 | 25.30 | 26.00 | 23.40 | 18.50 |
| 14 | 29.30 | 26.60 | 28.80 | 25.40 | 19.10 |
| 15 | 17.70 | 19.80 | 15.40 | 20.90 | 22.20 |



|    |       |       |       |       |       |
|----|-------|-------|-------|-------|-------|
| 15 | 16.40 | 17.30 | 12.70 | 13.60 | 13.70 |
| 15 | 19.50 | 13.70 | 14.50 | 22.80 | 18.00 |
| 16 | 30.50 | 31.80 | 30.40 | 33.00 | 26.20 |
| 16 | 35.20 | 31.10 | 29.30 | 31.80 | 25.00 |
| 16 | 30.90 | 30.50 | 32.50 | 35.40 | 23.50 |
| 18 | 28.60 | 24.90 | 29.50 | 27.80 | 29.90 |
| 18 | 29.10 | 28.70 | 27.20 | 29.70 | 30.60 |
| 18 | 27.80 | 27.00 | 29.20 | 27.30 | 32.10 |
| 19 | 28.50 | 24.70 | 21.20 | 18.70 | 20.20 |
| 19 | 27.10 | 24.80 | 17.20 | 17.40 | 23.70 |
| 19 | 25.10 | 20.40 | 23.10 | 11.90 | 21.40 |
| 20 | 32.90 | 26.60 | 21.60 | 29.30 | 26.90 |

| F1      |       |       |       |       |       |
|---------|-------|-------|-------|-------|-------|
| Subject | t0    | t2    | t4    | t8    | t24   |
| 20      | 30.70 | 25.60 | 22.30 | 29.60 | 28.90 |
| 20      | 32.00 | 29.10 | 22.90 | 25.50 | 34.90 |
| 21      | 28.80 | 27.60 | 27.70 | 28.40 | 30.40 |
| 21      | 25.30 | 32.00 | 31.80 | 28.60 | 28.20 |
| 21      | 25.60 | 27.30 | 24.80 | 27.50 | 25.20 |
| 23      | 17.80 | 14.20 | 14.20 | 19.00 | 18.00 |
| 23      | 15.70 | 17.00 | 13.60 | 17.90 | 17.00 |
| 23      | 18.60 | 16.40 | 14.00 | 18.40 | 16.70 |

|    |       |       |       |       |       |
|----|-------|-------|-------|-------|-------|
| 24 | 23.50 | 28.40 | 21.40 | 29.80 | 23.70 |
| 24 | 25.50 | 25.70 | 24.00 | 31.70 | 26.00 |
| 24 | 28.40 | 27.60 | 27.00 | 35.60 | 29.90 |
| 25 | 27.80 | -     | -     | -     | 24.90 |
| 25 | 31.70 | -     | -     | -     | 26.30 |
| 25 | 33.00 | -     | -     | -     | 26.30 |
| 26 | 29.00 | -     | -     | -     | 40.70 |
| 26 | 34.00 | -     | -     | -     | 42.60 |
| 26 | 27.50 | -     | -     | -     | 37.30 |
| 27 | 22.80 | -     | -     | -     | 23.40 |
| 27 | 21.10 | -     | -     | -     | 24.90 |
| 27 | 23.70 | -     | -     | -     | 27.40 |
| 28 | 21.60 | -     | -     | -     | 21.40 |
| 28 | 23.00 | -     | -     | -     | 21.50 |
| 28 | 25.40 | -     | -     | -     | 22.00 |
| 29 | 39.30 | -     | -     | -     | 41.70 |
| 29 | 41.70 | -     | -     | -     | 42.60 |
| 29 | 42.10 | -     | -     | -     | 43.00 |
| 30 | 32.30 | -     | -     | -     | 33.30 |
| 30 | 29.80 | -     | -     | -     | 31.70 |
| 30 | 33.20 | -     | -     | -     | 33.60 |

Table S5.8 – Data analysis AADE of the hydration values from all the subjects at time zero (T0), and .after application of the F1, 2h, 4h, 8h and 24h.

| F1      |       |       |       |       |       |       |
|---------|-------|-------|-------|-------|-------|-------|
| Subject | t0*   | t0**  | t2*   | t4*   | t8*   | t24** |
| 1       | 40.60 | -     | 31.30 | 32.30 | 29.90 | -     |
| 1       | 37.20 | -     | 25.70 | 24.70 | 24.90 | -     |
| 1       | 39.50 | -     | 31.00 | 31.50 | 29.10 | -     |
| 2       | 38.10 | 38.10 | 24.40 | 28.80 | 33.00 | 34.20 |
| 2       | 32.40 | 32.40 | 24.40 | 25.90 | 31.10 | 29.90 |
| 2       | 36.80 | 36.80 | 23.70 | 27.10 | 32.60 | 32.70 |
| 4       | 38.30 | -     | 36.30 | 35.00 | 37.60 | -     |
| 4       | 44.30 | -     | 33.30 | 37.10 | 34.20 | -     |
| 4       | 37.80 | -     | 32.40 | 34.00 | 35.50 | -     |
| 5       | 23.10 | 23.10 | 28.50 | 27.40 | 24.50 | 23.80 |
| 5       | 19.20 | 19.20 | 27.50 | 24.20 | 18.90 | 18.00 |
| 5       | 20.60 | 20.60 | 25.70 | 21.40 | 18.10 | 20.00 |
| 6       | 28.90 | -     | 35.40 | 39.20 | 25.40 | -     |
| 6       | 25.80 | -     | 30.10 | 38.10 | 27.40 | -     |
| 6       | 27.50 | -     | 32.70 | 38.00 | 24.70 | -     |
| 9       | 33.60 | 33.60 | 32.70 | 28.90 | 32.90 | 34.90 |
| 9       | 29.90 | 29.90 | 28.50 | 21.40 | 27.80 | 25.80 |
| 9       | 32.10 | 32.10 | 31.10 | 29.70 | 35.70 | 32.90 |
| 12      | 31.80 | -     | 37.30 | 36.30 | 25.80 | -     |
| 12      | 33.60 | -     | 28.90 | 29.10 | 26.70 | -     |

|    |       |       |       |       |       |       |
|----|-------|-------|-------|-------|-------|-------|
| 12 | 28.10 | -     | 34.80 | 33.30 | 22.50 | -     |
| 13 | 20.50 | 20.50 | 20.60 | 24.50 | 22.70 | 20.20 |
| 13 | 22.90 | 22.90 | 21.70 | 23.30 | 28.40 | 24.20 |
| 13 | 23.90 | 23.90 | 20.20 | 20.30 | 28.70 | 22.90 |
| 14 | 36.40 | -     | 26.80 | 30.70 | 25.70 | -     |
| 14 | 28.90 | -     | 25.30 | 26.00 | 23.40 | -     |
| 14 | 29.30 | -     | 26.60 | 28.80 | 25.40 | -     |
| 15 | 17.70 | 17.70 | 19.80 | 15.40 | 20.90 | 22.20 |
| 15 | 16.40 | 16.40 | 17.30 | 12.70 | 13.60 | 13.70 |
| 15 | 19.50 | 19.50 | 13.70 | 14.50 | 22.80 | 18.00 |
| 16 | 30.50 | 30.50 | 31.80 | 30.40 | 33.00 | 26.20 |
| 16 | 35.20 | 35.20 | 31.10 | 29.30 | 31.80 | 25.00 |
| 16 | 30.90 | 30.90 | 30.50 | 32.50 | 35.40 | 23.50 |
| 18 | 28.60 | 28.60 | 24.90 | 29.50 | 27.80 | 29.90 |
| 18 | 29.10 | 29.10 | 28.70 | 27.20 | 29.70 | 30.60 |
| 18 | 27.80 | 27.80 | 27.00 | 29.20 | 27.30 | 32.10 |
| 19 | 28.50 | -     | 24.70 | 21.20 | 18.70 | -     |

| F1      |       |      |       |       |       |       |
|---------|-------|------|-------|-------|-------|-------|
| Subject | t0*   | t0** | t2*   | t4*   | t8*   | t24** |
| 19      | 27.10 | -    | 24.80 | 17.20 | 17.40 | -     |
| 19      | 25.10 | -    | 20.40 | 23.10 | 11.90 | -     |

|    |       |       |       |       |       |       |
|----|-------|-------|-------|-------|-------|-------|
| 20 | 32.90 | 32.90 | 26.60 | 21.60 | 29.30 | 26.90 |
| 20 | 30.70 | 30.70 | 25.60 | 22.30 | 29.60 | 28.90 |
| 20 | 32.00 | 32.00 | 29.10 | 22.90 | 25.50 | 34.90 |
| 21 | 28.80 | 28.80 | 27.60 | 27.70 | 28.40 | 30.40 |
| 21 | 25.30 | 25.30 | 32.00 | 31.80 | 28.60 | 28.20 |
| 21 | 25.60 | 25.60 | 27.30 | 24.80 | 27.50 | 25.20 |
| 23 | 17.80 | 17.80 | 14.20 | 14.20 | 19.00 | 18.00 |
| 23 | 15.70 | 15.70 | 17.00 | 13.60 | 17.90 | 17.00 |
| 23 | 18.60 | 18.60 | 16.40 | 14.00 | 18.40 | 16.70 |
| 24 | 23.50 | 23.50 | 28.40 | 21.40 | 29.80 | 23.70 |
| 24 | 25.50 | 25.50 | 25.70 | 24.00 | 31.70 | 26.00 |
| 24 | 28.40 | 28.40 | 27.60 | 27.00 | 35.60 | 29.90 |
| 25 | -     | 27.80 | -     | -     | -     | 24.90 |
| 25 | -     | 31.70 | -     | -     | -     | 26.30 |
| 25 | -     | 33.00 | -     | -     | -     | 26.30 |
| 26 | -     | 29.00 | -     | -     | -     | 40.70 |
| 26 | -     | 34.00 | -     | -     | -     | 42.60 |
| 26 | -     | 27.50 | -     | -     | -     | 37.30 |
| 27 | -     | 22.80 | -     | -     | -     | 23.40 |
| 27 | -     | 21.10 | -     | -     | -     | 24.90 |
| 27 | -     | 23.70 | -     | -     | -     | 27.40 |
| 28 | -     | 21.60 | -     | -     | -     | 21.40 |
| 28 | -     | 23.00 | -     | -     | -     | 21.50 |

|                                                                                                                                                                                                                                                                 |   |       |   |   |   |       |
|-----------------------------------------------------------------------------------------------------------------------------------------------------------------------------------------------------------------------------------------------------------------|---|-------|---|---|---|-------|
| 28                                                                                                                                                                                                                                                              | - | 25.40 | - | - | - | 22.00 |
| 29                                                                                                                                                                                                                                                              | - | 39.30 | - | - | - | 41.70 |
| 29                                                                                                                                                                                                                                                              | - | 41.70 | - | - | - | 42.60 |
| 29                                                                                                                                                                                                                                                              | - | 42.10 | - | - | - | 43.00 |
| 30                                                                                                                                                                                                                                                              | - | 32.30 | - | - | - | 33.30 |
| 30                                                                                                                                                                                                                                                              | - | 29.80 | - | - | - | 31.70 |
| 30                                                                                                                                                                                                                                                              | - | 33.20 | - | - | - | 33.60 |
| <p>*1st group: values considered for the hydration evaluation at time-points 2 hours, 4 hours and 8 hours after products' application</p> <p>**2nd group: values considered for the hydration evaluation at time-point 24 hours after products' application</p> |   |       |   |   |   |       |

Table S5.9 – Information regarding the hydration (A.U.) values from all the subjects at time zero (T0), and .after application of the F2, 2h, 4h, 8h and 24h.

| F2      |       |       |       |       |       |
|---------|-------|-------|-------|-------|-------|
| Subject | t0    | t2    | t4    | t8    | t24   |
| 1       | 34.60 | 33.80 | 32.30 | 31.50 | 28.90 |
| 1       | 34.20 | 26.20 | 28.40 | 25.90 | 25.80 |
| 1       | 37.10 | 29.20 | 31.10 | 31.60 | 26.70 |
| 2       | 43.60 | 44.30 | 41.70 | 42.10 | 40.50 |
| 2       | 43.60 | 44.70 | 35.90 | 41.80 | 32.00 |

|    |       |       |       |       |       |
|----|-------|-------|-------|-------|-------|
| 2  | 41.80 | 33.50 | 41.50 | 50.60 | 34.40 |
| 4  | 31.00 | 29.10 | 29.40 | 32.70 | 27.60 |
| 4  | 30.80 | 25.20 | 27.80 | 31.80 | 25.00 |
| 4  | 31.40 | 30.80 | 30.00 | 33.60 | 29.90 |
| 5  | 25.60 | 25.40 | 22.00 | 15.90 | 25.20 |
| 5  | 21.50 | 23.40 | 15.50 | 16.90 | 19.20 |
| 5  | 21.30 | 21.90 | 13.90 | 12.30 | 17.60 |
| 6  | 28.80 | 30.60 | 28.60 | 23.10 | 25.10 |
| 6  | 28.60 | 34.10 | 32.10 | 25.10 | 27.00 |
| 6  | 26.40 | 31.00 | 30.10 | 25.30 | 27.10 |
| 9  | 35.60 | 31.60 | 23.70 | 32.10 | 35.00 |
| 9  | 34.70 | 33.60 | 26.00 | 33.00 | 32.40 |
| 9  | 32.50 | 33.00 | 24.20 | 35.40 | 30.10 |
| 12 | 36.40 | 36.60 | 31.10 | 26.50 | 23.40 |
| 12 | 36.20 | 37.70 | 35.80 | 25.90 | 26.20 |
| 12 | 31.70 | 33.50 | 32.90 | 30.70 | 22.50 |
| 13 | 18.00 | 22.60 | 21.80 | 25.30 | 21.40 |
| 13 | 18.80 | 19.20 | 15.20 | 19.70 | 15.90 |
| 13 | 19.00 | 24.70 | 22.70 | 23.80 | 24.00 |
| 14 | 34.60 | 32.20 | 32.40 | 32.30 | 28.20 |
| 14 | 34.20 | 32.80 | 36.50 | 35.00 | 28.30 |
| 14 | 36.90 | 34.40 | 35.60 | 35.00 | 31.10 |
| 15 | 15.80 | 13.90 | 17.80 | 13.70 | 15.90 |

|    |       |       |       |       |       |
|----|-------|-------|-------|-------|-------|
| 15 | 14.50 | 17.10 | 18.60 | 17.20 | 21.00 |
| 15 | 15.10 | 14.30 | 12.80 | 13.90 | 14.60 |
| 16 | 25.70 | 22.60 | 23.90 | 30.40 | 27.20 |
| 16 | 25.40 | 28.50 | 26.60 | 29.60 | 22.20 |
| 16 | 23.40 | 22.30 | 23.30 | 30.80 | 20.50 |
| 18 | 24.00 | 14.00 | 15.50 | 15.00 | 19.70 |
| 18 | 17.90 | 13.90 | 15.80 | 17.00 | 17.20 |
| 18 | 24.10 | 14.50 | 14.30 | 16.40 | 21.40 |
| 19 | 31.10 | 31.10 | 32.20 | 26.30 | 25.00 |

| F2      |       |       |       |       |       |
|---------|-------|-------|-------|-------|-------|
| Subject | t0    | t2    | t4    | t8    | t24   |
| 19      | 28.40 | 27.10 | 28.00 | 22.60 | 25.20 |
| 19      | 28.20 | 26.20 | 27.50 | 18.40 | 24.00 |
| 20      | 31.20 | 28.30 | 29.60 | 24.00 | 29.90 |
| 20      | 29.10 | 27.50 | 26.20 | 33.40 | 27.10 |
| 20      | 31.90 | 31.70 | 32.10 | 32.00 | 28.40 |
| 21      | 27.30 | 27.00 | 25.00 | 22.80 | 24.70 |
| 21      | 25.70 | 29.70 | 23.40 | 21.60 | 30.80 |
| 21      | 24.60 | 24.00 | 22.00 | 23.50 | 26.70 |
| 23      | 20.10 | 18.90 | 12.90 | 19.10 | 21.80 |
| 23      | 19.30 | 16.40 | 15.00 | 18.20 | 18.80 |



|    |       |       |       |       |       |
|----|-------|-------|-------|-------|-------|
| 23 | 17.20 | 18.50 | 14.50 | 20.30 | 21.70 |
| 24 | 32.20 | 23.70 | 28.50 | 30.20 | 30.60 |
| 24 | 29.80 | 26.40 | 27.10 | 29.30 | 29.30 |
| 24 | 30.20 | 22.80 | 25.60 | 28.40 | 30.40 |
| 25 | 35.90 | -     | -     | -     | 28.00 |
| 25 | 36.20 | -     | -     | -     | 32.00 |
| 25 | 37.70 | -     | -     | -     | 31.50 |
| 26 | 34.70 | -     | -     | -     | 43.80 |
| 26 | 29.60 | -     | -     | -     | 35.70 |
| 26 | 28.00 | -     | -     | -     | 40.30 |
| 27 | 28.80 | -     | -     | -     | 27.90 |
| 27 | 22.90 | -     | -     | -     | 29.80 |
| 27 | 26.70 | -     | -     | -     | 33.30 |
| 28 | 23.70 | -     | -     | -     | 25.10 |
| 28 | 22.90 | -     | -     | -     | 25.20 |
| 28 | 28.60 | -     | -     | -     | 23.90 |
| 29 | 35.40 | -     | -     | -     | 34.70 |
| 29 | 30.30 | -     | -     | -     | 32.90 |
| 29 | 31.40 | -     | -     | -     | 39.00 |
| 30 | 31.80 | -     | -     | -     | 28.20 |
| 30 | 24.40 | -     | -     | -     | 24.00 |
| 30 | 29.20 | -     | -     | -     | 27.20 |

Table S5.10 – Data analysis AADE of the hydration values from all the subjects at time zero (T0), and .after application of the F2, 2h, 4h, 8h and 24h.

| F2      |       |       |       |       |       |       |
|---------|-------|-------|-------|-------|-------|-------|
| Subject | t0*   | t0**  | t2*   | t4*   | t8*   | t24** |
| 1       | 34.60 | -     | 33.80 | 32.30 | 31.50 | -     |
| 1       | 34.20 | -     | 26.20 | 28.40 | 25.90 | -     |
| 1       | 37.10 | -     | 29.20 | 31.10 | 31.60 | -     |
| 2       | 43.60 | 43.60 | 44.30 | 41.70 | 42.10 | 40.50 |
| 2       | 43.60 | 43.60 | 44.70 | 35.90 | 41.80 | 32.00 |
| 2       | 41.80 | 41.80 | 33.50 | 41.50 | 50.60 | 34.40 |
| 4       | 31.00 | -     | 29.10 | 29.40 | 32.70 | -     |
| 4       | 30.80 | -     | 25.20 | 27.80 | 31.80 | -     |
| 4       | 31.40 | -     | 30.80 | 30.00 | 33.60 | -     |
| 5       | 25.60 | 25.60 | 25.40 | 22.00 | 15.90 | 25.20 |
| 5       | 21.50 | 21.50 | 23.40 | 15.50 | 16.90 | 19.20 |
| 5       | 21.30 | 21.30 | 21.90 | 13.90 | 12.30 | 17.60 |
| 6       | 28.80 | -     | 30.60 | 28.60 | 23.10 | -     |

|    |       |       |       |       |       |       |
|----|-------|-------|-------|-------|-------|-------|
| 6  | 28.60 | -     | 34.10 | 32.10 | 25.10 | -     |
| 6  | 26.40 | -     | 31.00 | 30.10 | 25.30 | -     |
| 9  | 35.60 | 35.60 | 31.60 | 23.70 | 32.10 | 35.00 |
| 9  | 34.70 | 34.70 | 33.60 | 26.00 | 33.00 | 32.40 |
| 9  | 32.50 | 32.50 | 33.00 | 24.20 | 35.40 | 30.10 |
| 12 | 36.40 | -     | 36.60 | 31.10 | 26.50 | -     |
| 12 | 36.20 | -     | 37.70 | 35.80 | 25.90 | -     |
| 12 | 31.70 | -     | 33.50 | 32.90 | 30.70 | -     |
| 13 | 18.00 | 18.00 | 22.60 | 21.80 | 25.30 | 21.40 |
| 13 | 18.80 | 18.80 | 19.20 | 15.20 | 19.70 | 15.90 |
| 13 | 19.00 | 19.00 | 24.70 | 22.70 | 23.80 | 24.00 |
| 14 | 34.60 | -     | 32.20 | 32.40 | 32.30 | -     |
| 14 | 34.20 | -     | 32.80 | 36.50 | 35.00 | -     |
| 14 | 36.90 | -     | 34.40 | 35.60 | 35.00 | -     |
| 15 | 15.80 | 15.80 | 13.90 | 17.80 | 13.70 | 15.90 |
| 15 | 14.50 | 14.50 | 17.10 | 18.60 | 17.20 | 21.00 |
| 15 | 15.10 | 15.10 | 14.30 | 12.80 | 13.90 | 14.60 |
| 16 | 25.70 | 25.70 | 22.60 | 23.90 | 30.40 | 27.20 |
| 16 | 25.40 | 25.40 | 28.50 | 26.60 | 29.60 | 22.20 |
| 16 | 23.40 | 23.40 | 22.30 | 23.30 | 30.80 | 20.50 |
| 18 | 24.00 | 24.00 | 14.00 | 15.50 | 15.00 | 19.70 |
| 18 | 17.90 | 17.90 | 13.90 | 15.80 | 17.00 | 17.20 |
| 18 | 24.10 | 24.10 | 14.50 | 14.30 | 16.40 | 21.40 |
| 19 | 31.10 | -     | 31.10 | 32.20 | 26.30 | -     |

| F2      |       |       |       |       |       |       |
|---------|-------|-------|-------|-------|-------|-------|
| Subject | t0*   | t0**  | t2*   | t4*   | t8*   | t24** |
| 19      | 28.40 | -     | 27.10 | 28.00 | 22.60 | -     |
| 19      | 28.20 | -     | 26.20 | 27.50 | 18.40 | -     |
| 20      | 31.20 | 31.20 | 28.30 | 29.60 | 24.00 | 29.90 |
| 20      | 29.10 | 29.10 | 27.50 | 26.20 | 33.40 | 27.10 |
| 20      | 31.90 | 31.90 | 31.70 | 32.10 | 32.00 | 28.40 |
| 21      | 27.30 | 27.30 | 27.00 | 25.00 | 22.80 | 24.70 |
| 21      | 25.70 | 25.70 | 29.70 | 23.40 | 21.60 | 30.80 |
| 21      | 24.60 | 24.60 | 24.00 | 22.00 | 23.50 | 26.70 |
| 23      | 20.10 | 20.10 | 18.90 | 12.90 | 19.10 | 21.80 |
| 23      | 19.30 | 19.30 | 16.40 | 15.00 | 18.20 | 18.80 |
| 23      | 17.20 | 17.20 | 18.50 | 14.50 | 20.30 | 21.70 |
| 24      | 32.20 | 32.20 | 23.70 | 28.50 | 30.20 | 30.60 |
| 24      | 29.80 | 29.80 | 26.40 | 27.10 | 29.30 | 29.30 |
| 24      | 30.20 | 30.20 | 22.80 | 25.60 | 28.40 | 30.40 |
| 25      | -     | 35.90 | -     | -     | -     | 28.00 |
| 25      | -     | 36.20 | -     | -     | -     | 32.00 |
| 25      | -     | 37.70 | -     | -     | -     | 31.50 |
| 26      | -     | 34.70 | -     | -     | -     | 43.80 |
| 26      | -     | 29.60 | -     | -     | -     | 35.70 |

|                                                                                                                                                                                                                                                                 |   |       |   |   |   |       |
|-----------------------------------------------------------------------------------------------------------------------------------------------------------------------------------------------------------------------------------------------------------------|---|-------|---|---|---|-------|
| 26                                                                                                                                                                                                                                                              | - | 28.00 | - | - | - | 40.30 |
| 27                                                                                                                                                                                                                                                              | - | 28.80 | - | - | - | 27.90 |
| 27                                                                                                                                                                                                                                                              | - | 22.90 | - | - | - | 29.80 |
| 27                                                                                                                                                                                                                                                              | - | 26.70 | - | - | - | 33.30 |
| 28                                                                                                                                                                                                                                                              | - | 23.70 | - | - | - | 25.10 |
| 28                                                                                                                                                                                                                                                              | - | 22.90 | - | - | - | 25.20 |
| 28                                                                                                                                                                                                                                                              | - | 28.60 | - | - | - | 23.90 |
| 29                                                                                                                                                                                                                                                              | - | 35.40 | - | - | - | 34.70 |
| 29                                                                                                                                                                                                                                                              | - | 30.30 | - | - | - | 32.90 |
| 29                                                                                                                                                                                                                                                              | - | 31.40 | - | - | - | 39.00 |
| 30                                                                                                                                                                                                                                                              | - | 31.80 | - | - | - | 28.20 |
| 30                                                                                                                                                                                                                                                              | - | 24.40 | - | - | - | 24.00 |
| 30                                                                                                                                                                                                                                                              | - | 29.20 | - | - | - | 27.20 |
| <p>*1st group: values considered for the hydration evaluation at time-points 2 hours, 4 hours and 8 hours after products' application</p> <p>**2nd group: values considered for the hydration evaluation at time-point 24 hours after products' application</p> |   |       |   |   |   |       |

Table S5.11 – Information regarding the hydration (A.U.) values from all the subjects at time zero (T0), and .after application of the F3, 2h, 4h, 8h and 24h.

| F3      |       |       |       |       |       |
|---------|-------|-------|-------|-------|-------|
| Subject | t0    | t2    | t4    | t8    | t24   |
| 1       | 35.50 | 27.60 | 35.00 | 30.80 | 26.10 |
| 1       | 33.00 | 23.70 | 34.60 | 29.80 | 25.20 |
| 1       | 39.60 | 29.60 | 33.40 | 29.30 | 24.40 |
| 2       | 25.70 | 33.50 | 32.30 | 29.50 | 28.20 |
| 2       | 34.70 | 33.80 | 34.20 | 38.00 | 32.20 |
| 2       | 26.50 | 33.80 | 29.40 | 35.50 | 26.20 |
| 4       | 36.00 | 32.90 | 34.80 | 33.70 | 32.10 |
| 4       | 36.00 | 28.80 | 32.60 | 31.70 | 30.00 |
| 4       | 33.50 | 30.80 | 30.60 | 33.70 | 28.50 |
| 5       | 17.70 | 24.20 | 23.40 | 24.10 | 27.30 |
| 5       | 20.80 | 27.00 | 27.90 | 19.00 | 25.60 |
| 5       | 16.90 | 25.80 | 23.40 | 23.10 | 27.00 |
| 6       | 28.50 | 35.00 | 32.80 | 24.10 | 23.20 |
| 6       | 23.80 | 27.10 | 28.40 | 23.80 | 23.20 |
| 6       | 30.90 | 31.80 | 32.50 | 27.20 | 28.60 |
| 9       | 37.60 | 28.40 | 21.40 | 27.80 | 30.30 |
| 9       | 36.60 | 24.40 | 19.50 | 32.60 | 28.20 |
| 9       | 35.30 | 28.10 | 24.50 | 29.50 | 28.00 |
| 12      | 41.90 | 36.30 | 34.90 | 28.70 | 29.40 |
| 12      | 33.50 | 30.30 | 32.30 | 29.70 | 26.70 |

|    |       |       |       |       |       |
|----|-------|-------|-------|-------|-------|
| 12 | 36.10 | 36.10 | 37.30 | 27.70 | 30.30 |
| 13 | 24.20 | 28.80 | 25.60 | 26.60 | 26.20 |
| 13 | 26.80 | 32.90 | 32.40 | 31.70 | 25.60 |
| 13 | 20.80 | 29.90 | 23.30 | 27.20 | 31.00 |
| 14 | 35.00 | 31.60 | 30.50 | 30.10 | 30.60 |
| 14 | 40.50 | 32.50 | 34.40 | 33.20 | 33.40 |
| 14 | 40.50 | 30.30 | 28.90 | 24.70 | 28.50 |
| 15 | 18.40 | 16.90 | 17.00 | 18.80 | 21.20 |
| 15 | 14.40 | 13.70 | 15.00 | 14.20 | 16.20 |
| 15 | 17.70 | 16.50 | 17.80 | 17.90 | 21.60 |
| 16 | 35.30 | 37.40 | 37.30 | 39.50 | 30.80 |
| 16 | 30.00 | 42.40 | 31.70 | 35.00 | 30.20 |
| 16 | 31.60 | 35.80 | 35.00 | 44.00 | 30.30 |
| 18 | 24.40 | 19.60 | 20.60 | 19.10 | 21.00 |
| 18 | 24.60 | 23.80 | 22.50 | 23.70 | 21.80 |
| 18 | 27.70 | 27.90 | 24.20 | 25.90 | 25.00 |
| 19 | 25.40 | 21.00 | 24.50 | 14.50 | 22.50 |

| F3      |       |       |       |       |       |
|---------|-------|-------|-------|-------|-------|
| Subject | t0    | t2    | t4    | t8    | t24   |
| 19      | 28.90 | 17.30 | 20.90 | 18.00 | 19.70 |

|    |       |       |       |       |       |
|----|-------|-------|-------|-------|-------|
| 19 | 30.40 | 18.80 | 20.90 | 17.20 | 19.50 |
| 20 | 24.20 | 21.50 | 20.00 | 33.30 | 19.30 |
| 20 | 27.10 | 17.00 | 14.40 | 27.30 | 29.30 |
| 20 | 29.50 | 21.00 | 16.50 | 33.70 | 21.10 |
| 21 | 31.30 | 32.10 | 29.90 | 31.20 | 28.70 |
| 21 | 26.30 | 30.20 | 25.20 | 29.10 | 24.50 |
| 21 | 23.80 | 24.10 | 28.00 | 30.00 | 26.90 |
| 23 | 15.80 | 16.20 | 10.50 | 12.70 | 23.60 |
| 23 | 19.20 | 16.50 | 12.40 | 13.50 | 19.00 |
| 23 | 15.10 | 15.60 | 13.20 | 16.70 | 20.30 |
| 24 | 29.50 | 35.90 | 29.40 | 37.00 | 27.90 |
| 24 | 31.20 | 38.10 | 29.30 | 29.70 | 33.50 |
| 24 | 33.90 | 36.40 | 30.70 | 33.60 | 31.10 |
| 25 | 34.50 | -     | -     | -     | 36.70 |
| 25 | 41.10 | -     | -     | -     | 35.70 |
| 25 | 34.70 | -     | -     | -     | 34.90 |
| 26 | 34.40 | -     | -     | -     | 41.30 |
| 26 | 29.10 | -     | -     | -     | 36.60 |
| 26 | 30.30 | -     | -     | -     | 38.40 |
| 27 | 28.70 | -     | -     | -     | 30.90 |
| 27 | 28.90 | -     | -     | -     | 29.80 |
| 27 | 26.00 | -     | -     | -     | 31.10 |
| 28 | 24.40 | -     | -     | -     | 26.70 |



|    |       |   |   |   |       |
|----|-------|---|---|---|-------|
| 28 | 27.80 | - | - | - | 23.70 |
| 28 | 27.50 | - | - | - | 26.80 |
| 29 | 38.80 | - | - | - | 35.40 |
| 29 | 35.70 | - | - | - | 34.70 |
| 29 | 42.10 | - | - | - | 39.40 |
| 30 | 33.20 | - | - | - | 28.90 |
| 30 | 35.00 | - | - | - | 33.70 |
| 30 | 35.70 | - | - | - | 33.30 |

Table S5.12 – Data analysis AADE of the hydration values from all the subjects at time zero (T0), and .after application of the F3, 2h, 4h, 8h and 24h

| F3      |       |       |       |       |       |       |
|---------|-------|-------|-------|-------|-------|-------|
| Subject | t0*   | t0**  | t2*   | t4*   | t8*   | t24** |
| 1       | 35.50 | -     | 27.60 | 35.00 | 30.80 | -     |
| 1       | 33.00 | -     | 23.70 | 34.60 | 29.80 | -     |
| 1       | 39.60 | -     | 29.60 | 33.40 | 29.30 | -     |
| 2       | 25.70 | 25.70 | 33.50 | 32.30 | 29.50 | 28.20 |

|    |       |       |       |       |       |       |
|----|-------|-------|-------|-------|-------|-------|
| 2  | 34.70 | 34.70 | 33.80 | 34.20 | 38.00 | 32.20 |
| 2  | 26.50 | 26.50 | 33.80 | 29.40 | 35.50 | 26.20 |
| 4  | 36.00 | -     | 32.90 | 34.80 | 33.70 | -     |
| 4  | 36.00 | -     | 28.80 | 32.60 | 31.70 | -     |
| 4  | 33.50 | -     | 30.80 | 30.60 | 33.70 | -     |
| 5  | 17.70 | 17.70 | 24.20 | 23.40 | 24.10 | 27.30 |
| 5  | 20.80 | 20.80 | 27.00 | 27.90 | 19.00 | 25.60 |
| 5  | 16.90 | 16.90 | 25.80 | 23.40 | 23.10 | 27.00 |
| 6  | 28.50 | -     | 35.00 | 32.80 | 24.10 | -     |
| 6  | 23.80 | -     | 27.10 | 28.40 | 23.80 | -     |
| 6  | 30.90 | -     | 31.80 | 32.50 | 27.20 | -     |
| 9  | 37.60 | 37.60 | 28.40 | 21.40 | 27.80 | 30.30 |
| 9  | 36.60 | 36.60 | 24.40 | 19.50 | 32.60 | 28.20 |
| 9  | 35.30 | 35.30 | 28.10 | 24.50 | 29.50 | 28.00 |
| 12 | 41.90 | -     | 36.30 | 34.90 | 28.70 | -     |
| 12 | 33.50 | -     | 30.30 | 32.30 | 29.70 | -     |
| 12 | 36.10 | -     | 36.10 | 37.30 | 27.70 | -     |
| 13 | 24.20 | 24.20 | 28.80 | 25.60 | 26.60 | 26.20 |
| 13 | 26.80 | 26.80 | 32.90 | 32.40 | 31.70 | 25.60 |
| 13 | 20.80 | 20.80 | 29.90 | 23.30 | 27.20 | 31.00 |
| 14 | 35.00 | -     | 31.60 | 30.50 | 30.10 | -     |
| 14 | 40.50 | -     | 32.50 | 34.40 | 33.20 | -     |
| 14 | 40.50 | -     | 30.30 | 28.90 | 24.70 | -     |

|    |       |       |       |       |       |       |
|----|-------|-------|-------|-------|-------|-------|
| 15 | 18.40 | 18.40 | 16.90 | 17.00 | 18.80 | 21.20 |
| 15 | 14.40 | 14.40 | 13.70 | 15.00 | 14.20 | 16.20 |
| 15 | 17.70 | 17.70 | 16.50 | 17.80 | 17.90 | 21.60 |
| 16 | 35.30 | 35.30 | 37.40 | 37.30 | 39.50 | 30.80 |
| 16 | 30.00 | 30.00 | 42.40 | 31.70 | 35.00 | 30.20 |
| 16 | 31.60 | 31.60 | 35.80 | 35.00 | 44.00 | 30.30 |
| 18 | 24.40 | 24.40 | 19.60 | 20.60 | 19.10 | 21.00 |
| 18 | 24.60 | 24.60 | 23.80 | 22.50 | 23.70 | 21.80 |
| 18 | 27.70 | 27.70 | 27.90 | 24.20 | 25.90 | 25.00 |
| 19 | 25.40 | -     | 21.00 | 24.50 | 14.50 | -     |

| F3      |       |       |       |       |       |       |
|---------|-------|-------|-------|-------|-------|-------|
| Subject | t0*   | t0**  | t2*   | t4*   | t8*   | t24** |
| 19      | 28.90 | -     | 17.30 | 20.90 | 18.00 | -     |
| 19      | 30.40 | -     | 18.80 | 20.90 | 17.20 | -     |
| 20      | 24.20 | 24.20 | 21.50 | 20.00 | 33.30 | 19.30 |
| 20      | 27.10 | 27.10 | 17.00 | 14.40 | 27.30 | 29.30 |
| 20      | 29.50 | 29.50 | 21.00 | 16.50 | 33.70 | 21.10 |
| 21      | 31.30 | 31.30 | 32.10 | 29.90 | 31.20 | 28.70 |
| 21      | 26.30 | 26.30 | 30.20 | 25.20 | 29.10 | 24.50 |
| 21      | 23.80 | 23.80 | 24.10 | 28.00 | 30.00 | 26.90 |
| 23      | 15.80 | 15.80 | 16.20 | 10.50 | 12.70 | 23.60 |

|    |       |       |       |       |       |       |
|----|-------|-------|-------|-------|-------|-------|
| 23 | 19.20 | 19.20 | 16.50 | 12.40 | 13.50 | 19.00 |
| 23 | 15.10 | 15.10 | 15.60 | 13.20 | 16.70 | 20.30 |
| 24 | 29.50 | 29.50 | 35.90 | 29.40 | 37.00 | 27.90 |
| 24 | 31.20 | 31.20 | 38.10 | 29.30 | 29.70 | 33.50 |
| 24 | 33.90 | 33.90 | 36.40 | 30.70 | 33.60 | 31.10 |
| 25 | -     | 34.50 | -     | -     | -     | 36.70 |
| 25 | -     | 41.10 | -     | -     | -     | 35.70 |
| 25 | -     | 34.70 | -     | -     | -     | 34.90 |
| 26 | -     | 34.40 | -     | -     | -     | 41.30 |
| 26 | -     | 29.10 | -     | -     | -     | 36.60 |
| 26 | -     | 30.30 | -     | -     | -     | 38.40 |
| 27 | -     | 28.70 | -     | -     | -     | 30.90 |
| 27 | -     | 28.90 | -     | -     | -     | 29.80 |
| 27 | -     | 26.00 | -     | -     | -     | 31.10 |
| 28 | -     | 24.40 | -     | -     | -     | 26.70 |
| 28 | -     | 27.80 | -     | -     | -     | 23.70 |
| 28 | -     | 27.50 | -     | -     | -     | 26.80 |
| 29 | -     | 38.80 | -     | -     | -     | 35.40 |
| 29 | -     | 35.70 | -     | -     | -     | 34.70 |
| 29 | -     | 42.10 | -     | -     | -     | 39.40 |
| 30 | -     | 33.20 | -     | -     | -     | 28.90 |
| 30 | -     | 35.00 | -     | -     | -     | 33.70 |
| 30 | -     | 35.70 | -     | -     | -     | 33.30 |

\*1st group: values considered for the hydration evaluation at time-points 2 hours, 4 hours and 8 hours after products' application

\*\*2nd group: values considered for the hydration evaluation at time-point 24 hours after products' application
